# Supplementary material for: 2015 Annual Report of the American Board of Psychiatry and Neurology, Inc.
Source: Atypon-hosted journal article supplement (doi:10.1176/appi.ajp.2016.1730801), 2016-08-01
Supplement: appi.ajp.2016.1730801.ds001.pdf [file appi.ajp.2016.1730801.ds001.pdf]

# ABPN Certification and MOC Recipients, 2015

|                                                     |          |
|-----------------------------------------------------|----------|
| Child and Adolescent Psychiatry Certification, 2015 | page 2   |
| Child and Adolescent Psychiatry, Part II, 2015      | page 21  |
| Child and Adolescent Psychiatry MOC, April 13, 2015 | page 24  |
| Child and Adolescent Psychiatry MOC, July 1, 2015   | page 29  |
| Psychiatry Certification, September 24, 2015        | page 30  |
| Psychiatry Part II, May 29, 2015                    | page 88  |
| Psychiatry Part II, September 25, 2015              | page 90  |
| Psychiatry MOC, February 9, 2015                    | page 91  |
| Psychiatry MOC, July 1, 2015                        | page 132 |
| Psychiatry MOC, August 10, 2015                     | page 133 |

## **Child and Adolescent Psychiatry Certification, 2015**

Heather Rene Adams, D.O., Denver, CO

Patricia Aguayo Rosas, M.D., Woodbridge, CT

Samara Mansour Ahmed, M.B.B.S., Trabuco Canyon, CA

Sailaja V Akella, D.O., Fishkill, NY

Sadeq Al-Sarraf, M.D., Milton, ON

Fahad Ali, M.D., Bryn Mawr, PA

Muneer Ali, D.O., Duluth, GA

Nevine D Ali, M.D., MPH, New York, NY

Aliya Nargis Ali-Nazimuddin, M.D., Lombard, IL

Kiyomi Elyse Ameriks, D.O., San Francisco, CA

Joy Andrade, M.D., Honolulu, HI

Frank Thomas Angotti III, M.D., Morgantown, WV

Maximus Nwakaunna Anitube, M.D., McKinney, TX

Jeffrey Aronowitz, D.O., Mount Laurel, NJ

Thomas Louis Atkins, M.D., Ann Arbor, MI

Jasmine Atwal, M.D., Fresno, CA

David Wade Atwood, M.D., Riverside, CA

Rozy Aurora, M.D., Valhalla, NY

Dilek Iris Avci, M.D., Bangor, ME

Olayinka Modupe Ayeni, M.D., The Woodlands, TX

Funda S. Bachini, M.D., Chandler, AZ

Lucas Paul Bachmann, M.D., Woodbury, MN

Suman Kumar Reddy Baddam, M.D., New Haven, CT

Nancy Jean Baehr, M.D., Edison, NJ

Matthew James Baker, D.O., Kettering, OH

Dalia Balsamo, M.D., New Haven, CT

Jonathan Barton, M.D., Philadelphia, PA

Feyza Basoglu, M.D., Burlington, VT

Kathleen Tappen Baynes, M.D., Rochester, NY

Rebecca Ariel Begtrup, D.O. MPH, Baltimore, MD

Cecilia Belardinelli, M.D., Summit, NJ

Kyle Benner, M.D., Seattle, WA

Cesar Ruben Berdeja, M.D., Campbell, CA

Luis Emilio Betancourt, M.D., Waxhaw, NC

Kawal Bir, M.D., Houston, TX

Leigh Fylstra Blalock, M.D., Durham, NC

Joshua Blum, M.D., Uxbridge, MA

Mahdieh Bodaghi, M.D., San Antonio, TX

Megan Borkon, M.D., Nashville, TN

Elizabeth Botts, M.D., Salt Lake City, UT

Jennifer Marie Bowden, M.D., Cincinnati, OH

Eric Neil-Jensen Boyum, M.D., Oskaloosa, IA

Buck Braden, D.O., Greensboro, NC

Ricki-Leigh Laura Brampton, M.D., Corpus Christi, TX

Sukhjit Brar, M.D., Clovis, CA

Jennifer Rebecca Breitbart, M.D., Los Angeles, CA

Charles Alfred Brown, M.D., Cleveland, OH

Matthew A Brown, D.O., Chicago, IL

Nicolas Brown, M.D., Portland, OR

Kim C. Brownell, M.D., Glastonbury, CT

Nancy Comer Buckner, M.D., Phoenix, AZ

Irena Bukelis, M.D., Vestavia, AL

Davita Meara Burkhead-Weiner, M.D., Ann Arbor, MI

Amber Neely Burks, M.D., Houston, TX

Julia Denise Burrow, M.D., Perrysburg, OH

Ahmar Butt, M.D., Waukee, IA

David Call, M.D., Washington, DC

Elizabeth Anne Calvin, M.D., Round Rock, TX

Amy Arnold Canuso, D.O., Santa Rita, GU

Jessica Malena Carbajal Sarmiento, M.D., Little Rock, AR

Alonso Cardenas, M.D., Valencia, CA

Stacey Brandt Carloni, M.D., Hooksett, NH

Adria Marlene Carney, M.D., San Jose, CA

Chelsea Mary Carson, M.D., Evans, GA

Kyle R Cedermark, M.D., Minneapolis, MN

Rohit Mathur Chandra, M.D., Chelsea, MA

Matthew Chang, M.D., Redlands, CA

Nadia Elizabeth Chargaia, M.D., Chapel Hill, NC

Albert Chen, M.D., Camarillo, CA

Marsha Alexis Chenoweth, M.D., Bellevue, WA

Megan Chiarelli, M.D., Seattle, WA

Shivani Verma Chmura, M.D., San Carlos, CA

Rebecca Eunjoo Cho, M.D., Hoffman Estates, IL

Nicole Victoria Christian, M.D., Dedham, MA

Ian Nui Chun, M.D., Kamuela, HI

Mariana Compagnone, M.D., Cardiff By The Sea, CA

Laura Jane Conley- Olsen, M.D., Greenbrier, AR

Ronald Salamat Cristobal, M.D., Austin, TX

Terry Shawn Crombie, M.D., Portland, OR

Fredrick Crow, M.D., Medford, MA

Jesselina Lovey Curry, M.D., Bowie, MD

Brian T Cuthbertson, M.D., Mission, KS

Kristin Aguilar Dalope, M.D., Pittsburgh, PA

Kristine Rasmussen Dangremond, M.D., Pueblo, CO

Srinivas Dannaram, M.B.B.S., Omaha, NE

Tracy Das, M.D., Johns Creek, GA

Kelly Jo Davidson, M.D., Mentor, OH

Joan Elizabeth Davis, M.D., Spokane, WA

Nilsa De Jesus Rosario, M.D., Riverview, FL

Inge Alexandra De Weille, M.D., Webster, NY

Almeria Anne Decker, M.D., Cincinnati, OH

Leslie Ann Deckter, M.D., Cincinnati, OH

Preneet Kaur Dhillon, M.D., Sacramento, CA

Deanna Lee Dial, D.O., Flower Mound, TX

Michael Richard DiGiacomo, M.D., Williamsville, NY

Aimee Dora DiPasqua, M.D., Hamburg, NY

Matthew Dean Dobbertin, D.O., Boys Town, NE

Sahar Douek, M.D., Sherman Oaks, CA

Jerita Johanna Dubash, D.O., Christiansburg, VA

Lance Russell Dunlop, M.D., Mullica Hill, NJ

Michelle Durham, M.D., Boston, MA

Erikka Daniene Dzirasa, M.D., M.P.H., Durham, NC

Linslee Marie Egan, M.D., Encino, CA

Tiana Sati Ekhande, D.O., Dewitt, MI

Rebecca Eleanya, M.D., MPH, Chambersburg, PA

Nonso Ekene Enekeuchi, M.D., MPH, Kew Gardens, NY

Richard John Ernst, D.O., Apo, AP

Nicholas Evangelidis, M.D., Manhattan, KS

Colin Mark Evans, M.D., New Bern, NC

Danae Ann Evans, M.D., Atlanta, GA

Abbey Lynn Faruzzo, D.O., Sea Cliff, NY

Veronica Fellman, D.O., Brooklyn, NY

Serena Fernandes, M.D., Boston, MA

Francesco Alessandro Ferrari, M.D., New York, NY

Carol Lynn Ferro, M.D., Tiburon, CA

Cindy Lim Fibel, M.D., new york, NY

Christine Marie Fiechter, D.O., Mesa, AZ

Sarah Florence, M.D., Chicago, IL

Latoya Anyika Floyd, M.D., Philadelphia, PA

Kristin Cynthia Francis, M.D., Salt Lake City, UT

Whitney Nicole Fulton, M.D., Huntington, WV

Lawrence Kwok-kit Fung, M.D., Stanford, CA

Mary Terese Gabriel, M.D., Washington, DC

Michael C. Gadbow, M.D., Redwood City, CA  
Lakshman Sudhir Gandham, M.D., Lynchburg, VA  
Karim Waguih Ghobrial-Sedky, M.D., Camden, NJ  
John D. Giannone, M.D., Quincy, MA  
Jasleen Gill, M.B.B.S., Minneapolis, MN  
Ritu Goel, M.B.B.S., Severn, MD  
Larissa Anne Grace, M.D., Rancho Cucamonga, CA  
Justin Donald Graham, M.D., Edina, MN  
Bradley Grant, D.O., Owings Mills, MD  
Jennifer Greco, M.D., Metairie, LA  
Stacy Lynn Greeter, M.D., Portland, OR  
Daniel Esteban Grosz, M.D., Encino, CA  
Eugene Grudnikoff, M.D., Bayside, NY  
Jerzy Grzebieluch, M.D., Destin, FL  
Sandeep Gude, M.D., west columbia, SC  
Perihan Esra Guvenek Cokol, M.D., Cambridge, MA  
Colleen Hagemann, M.D., New Orleans, LA  
Julie Hall, M.D., Los Angeles, CA  
Cliff Scott Hamilton, M.D., Westfield, NJ  
Christopher Hammond, M.D., Baltimore, MD  
Kamna Handa, M.B.B.S., Springfield, IL  
Meredith Hannan, M.D., PhD, Santa Monica, CA  
Liina Hanson, M.D., Melbourne Beach, FL  
Bethany L Harper, M.D., Yellow Springs, OH  
Jocelyn Ann Hart, M.D., Ann Arbor, MI

John Robert Hart, M.D., Norwood, MA

Kirby Glen Harvey, M.D., Ocean Springs, MS

Robert Joseph Haskell, M.D., Los Angeles, CA

Elizabeth Hay, M.D., South Bend, IN

Munya Hayek, M.D., Boston, MA

Debra Leigh Heck, M.D., Baltimore, MD

Carolyn Jean Gonter Hendricks, M.D., De Pere, WI

Melissa Hendriks, M.D., Royal Oak, MI

Mariela Herrera Rojas, M.D., Billings, MT

Olga Ogai Hewett, M.D., Redwood City, CA

Kent Ray Hill, M.D., Ph.D., University Place, WA

Rachel Anya Hnatowich, M.D., Calgary, AB

Jamie A. Hom, M.D., Philadelphia, PA

Rebecca Eve Hommer, M.D., Rockville, MD

Rebecca Hopkinson, M.D., Seattle, WA

Hooman Hormozian, M.D., Porter Ranch, CA

Jacqueline Hubbard, M.D., St Pete Beach, FL

Peter Chu Chen Hung, M.D., La Palma, CA

Ted Bryan Hunter, M.D., Detroit, MI

Amanda Katherine Bowles Hutchison, M.D., Denver, CO

Lisa Brooks Hutchison, M.D., Durham, NC

Nga Thu Huynh, M.D., Memphis, TN

Michael Hwang, M.D., Los Alamitos, CA

Ihab Ibrahim, M.D., Brooklyn, NY

Richard Idell, M.D., Tyler, TX



Mfon Malachy Inyang, M.D., Leesburg, GA  
Allison Yuri Iwaoka-Scott, M.D., San Francisco, CA  
Stephanie Ann Jallen, M.D., Bismarck, ND  
Jason James, M.D., Houston, TX  
Tara-Willow Ferren James, M.D., Spokane, WA  
Shanti Jampani, M.B.B.S., Weston, FL  
Delanie Jean Janke, M.D., Cincinnati, OH  
Shonda Renee Janke-Stedronsky, M.D., Georgetown, TX  
Cory Daniel Jaques, M.D., Visalia, CA  
Jessica Jeffrey, D.O., Salem, VA  
Anik Jhonsa, M.D., Philadelphia, PA  
Gwendolyn R Jones, M.D., Pinehurst, NC  
Ian Matthew Jones, M.D., Goleta, CA  
Jessica Michelle Jones, M.D., Draper, UT  
Asiya Kabir, M.D., New Hyde Park, NY  
Sharon Marie Kahler, M.D., Hampstead, NC  
Saili Kalaskar, M.B.B.S., Hartford, CT  
Yoshio Arturo Kaneko, M.D., Boston, MA  
Andrew Peter Kaplan, D.O., Exeter, NH  
Arjun Girish Karkhanis, M.D., Austin, TX  
Michael Edward Kase, M.D., Bakersfield, CA  
Erica Pearson Kass, M.D., Englewood, NJ  
Mandeep Kaur, M.B.B.S., Lumberton, NC  
Christopher John Keary, M.D., Lexington, MA  
Matthew Thomas Keener, M.D., Pittsburgh, PA

Jusleen Kendhari, M.D., Columbia, MO  
Ernest Jeremy Kendrick, M.D., Sandy, UT  
Moiria Kathryn Kessler, M.D., Stanford, CA  
Christina Tara Khan, M.D., Palo Alto, CA  
Arash John Khatami, M.D., San Diego, CA  
David Kim, D.O., Anchorage, AK  
Matthew Klein, D.O., Mesa, AZ  
Aruna Devi Kodali, M.D., North Canton, OH  
Venkata Kolli, M.B.B.S., Elkhorn, NE  
Moya Kombrinck, M.D., Redding, CA  
Vlad Kononchuk, M.D., Dix Hills, NY  
Antigone Demosthenous Kostas, M.D., Greenwich, CT  
Supriya Sharma Kothavale, D.O., New York, NY  
Elizabeth DeRose Kowal, M.D., Ada, MI  
Sylvia Krinsky, M.D., Boston, MA  
Stephanie Kua, M.D., Buena Park, CA  
Sarah Suzanne Kuhn, M.D., Charleston, SC  
Sanaz Kumar, M.D., Rockville, MD  
Tarun Kumar, M.D., Watertown, NY  
Mercedes Kristen Kwiatkowski, M.D., Redwood City, CA  
Serafin Tambaosan L alas Jr., M.D., Loma Linda, CA  
Whitney E. Landa, M.D., San Carlos, CA  
Kathryn Alexis Langham, M.D., San Diego, CA  
Adrienne Alicia Langlinais, M.D., Charleston, SC  
Janna Alfery Larson, M.D., Encinitas, CA

Holly Beth Law, M.D., Crofton, MD

Vandai Xuan Le, M.D., Newport Beach, CA

Jessica Lee, M.D., Oakland, CA

Soo Jung Lee, M.D., Hoffman Estates, IL

Gary Lelonek, M.D., Flushing, NY

Amber Faith Lerma, M.D., Moraga, CA

Clark Costigan Lester, M.D., Corbin, KY

Elizabeth Jane Levey, M.D., Chicago, IL

Matthew Levin, M.D., Chestnut Hill, MA

Joseph Allan Levine, M.D., Stony Brook, NY

Maria Levine, M.D., Granada Hills, CA

Andrew Hyun Liew, M.D., Clackamas, OR

Kimberly C Lo, M.D., Los Angeles, CA

David Adam Lovas, M.D., Halifax, NS

Lynne Ann Love, M.D., Sacramento, CA

Matthew Lowe, D.O., Hilliard, OH

Meredith Macgregor, M.D., New York, NY

Carlene Marie MacMillan, M.D., Brooklyn, NY

Pavan Kundan Madan, M.D., Davis, CA

Aman Mahajan, M.B.B.S., Wauwatosa, WI

Huma Mahmood, D.O., Philadelphia, PA

Muhammad Hassan Majeed, M.D., Norwich, CT

Salman Majeed, M.B.B.S., Hummelstown, PA

Nasuh Malas, M.D., Ypsilanti, MI

Devanand Sadanand Manoli, M.D., Ph.D., San Francisco, CA

Tatjana Maric, M.D., Grand Rapids, MI

Rebecca Marshall, M.D., Portland, OR

Clinton Martin, M.D., Hoover, AL

Kara Dawn Martinez, M.D., Albuquerque, NM

Angel E. Martinez Irizarry, M.D., Ponce, PR

Raman Marwaha, M.B.B.S., Bratenahl, OH

Karen Ashby Mathewson, M.D., Rye, NY

Robert Juliusz Maydell, M.D., Chicago, IL

Alastair J McKean, M.D., Rochester, MN

Dylan McKenney, M.D., Lewiston, ME

Courtney Lockhart McMickens, M.D., New Haven, CT

Daniel Medeiros Almeida, M.D., West Chester, OH

Littal Melnik, M.D., New York, NY

Elizabeth Rachel Menefee, M.D., Brecksville, OH

Tracy Lo Suyi Meyer, M.D., Washington, DC

Andrew J Mietz, M.D., Rochester, NY

Mitali Sathi Mitra, M.D., Tucson, AZ

Paul Anthony Mitrani, M.D., East Setauket, NY

Adebowale Mofikoya, M.D., Sun Prairie, WI

Rihab Mohamed, M.D., Brecksville, OH

Jasmine Kaur Moondra, M.D., Rockville, MD

Nakita Monique Moore, M.D., Temple, TX

Preska Melissa Moore, M.D., Crozet, VA

Rosa M. Morales-Theodore, M.D., Glen Allen, VA

Sonal Kishore Moratschek, M.D., Shaker Heights, OH

Alvaro Moreno, M.D., Dickinson, TX

Danielle Brooke Morgan-Goerke, D.O., Minneapolis, MN

Jessica Wallace Morine, M.D., Chelsea, MA

Karen Jennings Mu, M.D., San Francisco, CA

Heather Muhr, D.O., Berkeley, CA

Richard Mullin, M.D., Morgantown, WV

Jyotsna Muttineni, M.D., Southlake, TX

Nivedita Sudhir Nadkarni, M.D., Fargo, ND

Alana E. Nagle, M.D., Boston, MA

Andrei Yevgenyevich Nagorny, M.D., Valhalla, NY

Shivana Devi Naidoo, M.D., Queens Village, NY

Sadiq Naveed, M.D., Lenexa, KS

Susan Teresa Neilan, M.D., Hudson, OH

Samuel Neuhut, M.D., Bay Harbor Islands, FL

Jennifer Mariko Neuwalder, M.D., Somerville, MA

Michael David Nevarez, M.D., Boston, MA

Brianna Arrington Newhouse, M.D., Farmington, MI

Matthew R Newton, D.O., Cleveland, OH

Nhu Doan Nguyen, M.D., Fountain Valley, CA

Theresa Toquyen Nguyen, D.O., Kirksville, MO

Jeniece Marie Nott, M.D., Coralville, IA

Jennifer Grace O'Donohoe, M.D., Salt Lake City, UT

Siobhan Elizabeth O'Herron, M.D., New York, NY

Jessica O'Neil, D.O., Essex Junction, VT

Tyler S Oesterle, M.D., Saint Cloud, MN

Taiye Akinwande Ogundipe, MBBS, Middletown, CT  
Natasha Smith Onasanya, M.D., M.P.H., Eagle River, AK  
Monica Ormeno, D.O., La Mesa, CA  
Uzoma Chris Osuchukwu, M.D., Las Vegas, NV  
Yasmin Nadia Owusu, M.D., Redwood City, CA  
Auralyd Padilla, M.D., Northborough, MA  
Angel G. Pagan Torres, M.D., San Juan, PR  
Michelle Lynn Palumbo, M.D., Brookline, MA  
Diana Marie Pandey, M.D., Minneapolis, MN  
Anushree Parashar, M.D., El Centro, CA  
Sanjay Hiroo Patel, M.D., Brooklyn, NY  
David Balis Patton, M.D., Charlotte, NC  
Sean Edward Paul, M.D., Celebration, FL  
Magdalena Beatriz Peixoto, M.D., Houston, TX  
Jaya Praveen Kumar Penagaluri, M.D., Towson, MD  
Anne Elizabeth Penner, M.D., Denver, CO  
Marilyn Peraza, M.D., Miami, FL  
Jesus Perez, M.D., Atascadero, CA  
Melissa Perry, M.D., North Tonawanda, NY  
Brian Ngoc Bao Pham, M.D., Kent, WA  
Victoria Ida Chau Pham, D.O., Stamford, CT  
Jessica Catherine Phelps, M.D., Pewaukee, WI  
Matthew Pierson, M.D., Salt Lake City, UT  
Theodote Kyriakos Pontikes, M.D., Chicago, IL  
Zoya Popivker, D.O., Smithtown, NY

Taniya Pradhan, M.D., Morgantown, WV  
Tracy Regina Protell, M.D., Stateline, NV  
Jessica Prowell, M.D., Gainesville, FL  
Rahim Nizar Rahemtulla, M.D., New York, NY  
Sabreen Rubaida Rahman, M.D., Beavercreek, OH  
Shubha Raja, M.D., Leawood, KS  
Shirley Mary Rajan, M.D., East Brunswick, NJ  
Rekha Ramanuja, M.D., Olivette, MO  
Michael Scott Ramsey, D.O., Seattle, WA  
Sonal Hamendra Rana, M.D., Diamond Bar, CA  
Vandana Sethi Rao, M.D., Dallas, TX  
Pramit Rastogi, M.D., Baltimore, MD  
Amit Rathi, M.D., Glastonbury, CT  
Hetal Bhingradia Reddy, M.D., New York, NY  
Harpreet Reeba, M.D., Glendale, NY  
Abby Lynn Reineck, M.D., Guilford, VT  
Katherine Michelle Revoredo, M.D., Norwalk, CA  
Timothy Reynolds Rice, M.D., New York, NY  
India Christine Richards, M.D., Austin, TX  
Kimberly Catherine Riquelme, D.O., Groton, CT  
Jared Tristan Ritter, M.D., Palm Coast, FL  
Eric Adam Robbins, M.D., Hollywood, FL  
Toya Denise Roberson-Moore, M.D., Chicago, IL  
Kimberly Robinson, M.D., Campbell Hall, NY  
Lee Adam Robinson, M.D., Somerville, MA

Yajaira Rodriguez, M.D., Manlius, NY

Miri Rosen, M.D., Flushing, NY

Amanda Thompson Roten, M.D., Summerville, SC

Faith Renee Rowland, M.D., Upper Marlboro, MD

Madlena Todorova Rush, D.O., Winston Salem, NC

Leila Sadeghi, M.D., Newport, RI

Reham Alber Adib Sadek, M.D., Tampa, FL

Renee Catherine Saenger, M.D., Tarrytown, NY

Sina Safahieh, M.D., Newport Beach, CA

David Safani, M.D., Orange, CA

Carlos Salgado, M.D., Miami, FL

Anoosh Salman, M.D., Champaign, IL

Amandeep Singh Saluja, M.D., Kentwood, MI

Esther Eunae Samadi, M.D., San Diego, CA

Samuel Inimbom Samuel, M.D., Macon, GA

Dustin Gabriel Sanchez, M.D., Los Angeles, CA

Joel Manuel Sanchez, M.D., Grand Ledge, MI

Marissa Ann Schiel, M.D., Highlands Ranch, CO

Justin J. Schleifer, M.D., Providence, RI

Scott T Schmidt, D.O., Rochester, MN

Emily R Schnurr, D.O., East Lansing, MI

Joseph Daniel Schuermeyer, M.D., Carlsbad, CA

Leah Schupp, M.D., Madison, WI

Lori Sara Schwartz, M.D., Baltimore, MD

Taylor Paige Scott, M.D., Crofton, MD



Jennifer Smith Segura, M.D., Charlotte, NC  
Amanda Marie Sells, D.O., Mission Hills, KS  
Kamalendra Sen, M.D., Briarwood, NY  
Justine Sever, D.O., West Newton, PA  
Lesha D Shah, M.D., New York, NY  
Mahwish Shakir, M.D., Houston, TX  
Ravi Shankar, M.D., Columbia, MO  
Arlenne Shapov, M.D., Chula Vista, CA  
Shephali Sharma, M.D., Austin, TX  
Patrick Shea, M.D., SLC, UT  
Fatima Mahnaz Sheikh, M.D., Oklahoma City, OK  
Raj Nanji Shekhat, M.D., Jupiter, FL  
Jillian Alexis Shellabarger, M.D., Yellow Springs, OH  
Meryam Sheriaty, M.D., Baldwin, NY  
Seleena Meher Shrestha, M.D., Springfield, IL  
Rana Sibai-Drake, M.D., Atlanta, GA  
Ayesha Silman, M.D., West Chester, PA  
Jennifer Singarayer, M.B.B.S., Manlius, NY  
Andrew Brewster Smith, M.D., Dayton, OH  
Darryl Curtis Smith, M.D., New York, NY  
Katherine Elise Smith, M.D., Shreveport, LA  
Laura Beth Smith, M.D., Moore, OK  
Stacy Ann Solheim, D.O., Dayton, OH  
Arya Soman, M.D., Port Washington, NY  
Margarita Ivanovna Somova, M.D., Redondo Beach, CA

Rishi Sood, M.D., Long Island City, NY

Kristina S. Sodar, M.D., Albuquerque, NM

Daniel Bonneson Spencer, M.D., Pawtucket, RI

Domenick John Sportelli, D.O., Boonton Township, NJ

Lauren Spring, M.D., Stony Brook, NY

Rajeev Srivastava, M.D., Williamsburg, VA

Jessica Stack, M.D., Morristown, NJ

Joshua David Stein, M.D., Minnetonka, MN

Evelyn Stephens, M.D., New York, NY

Jeffrey James Stephens, M.D., Greenville, SC

Sarah Diamond Steuerman, M.D., Chicago, IL

Mihaela Valentina Stoica, M.D., Irving, TX

Linda A Stull, D.O., Clarendon Hills, IL

Dawn Sung, M.D., Moraga, CA

Alejandra Ruth Suzuki, M.D., Irvine, CA

Cynthia Anne Swartz, M.D., Saint Johnsbury, VT

Matthew J. Swenson, M.D., Provo, UT

Fauzia Nisar Syed, M.D., Glenelg, MD

Haiwang Tang, M.D., Edmond, OK

Mudassar Tariq, M.D., Sugar Land, TX

Shannon Lindsay Terkell, M.D., Riverside, RI

Megan Patricia Thompson, D.O., Baton Rouge, LA

Tiffany Nicole Thomure, M.D., Georgetown, TX

Lindsay Shotts Tobler, M.D., Kansas City, MO

TeeJay Grant Tripp, D.O., Gilbert, AZ

Peter Emmanuel O. Turkson, D.O., Cleveland Heights, OH

Allison Tweedie, M.D., Fairfax, VA

Dan Mario Udrea, M.D., Pittsburgh, PA

Susan Chukwuchebeanyi Uyanna, M.D., De Pere, WI

Seema Susan Varghees, M.D., Austin, TX

Carrie Anne Hoyt Vaudreuil, M.D., Boston, MA

Sheridan L. Vecchio, M.D., Chagrin Falls, OH

Milka Vega Perez, M.D., Yauco, PR

Nina M Vega Vazquez, M.D., Juana Diaz, PR

Geetika Mehrishi Verma, M.D., Edmond, OK

Kelley Jean Victor, M.D., Pittsburgh, PA

Lyndon Villasenor, D.O., Shorewood, IL

Jennifer Ann Ilene Vinch, M.D., Shelby Township, MI

Donna Vishnevetsky, M.D., Denver, CO

Michelle L. Vo, M.D., Salt Lake City, UT

Emma K. Wall, M.D., Los Angeles, CA

Joshua Junhua Wang, M.D., Plano, TX

Nisha Warikoo, M.B.B.S., Irvine, CA

Rachel Waxman, M.D., Woodmere, NY

Sara Weekly, M.D., Brooklyn, NY

Josette Weibrecht, M.D., Tucson, AZ

Ashley Weiss, D.O., New Orleans, LA

Meredith Weiss, M.D., New York, NY

Melissa Anne Wellner, M.D., Severna Park, MD

Kimberly Pirrone Wells, M.D., Portland, ME

Philip Williams, M.D., Eugene, OR

Genevieve Anne Williamson, M.D., North Ferrisburgh, VT

Matthew Dean Willis, M.D., MPH, East Greenwich, RI

Thandar Aung Win, M.D., Middletown, NY

Christina Shuman Wise, M.D., Covington, KY

Justine Reeder Wittenauer, M.D., Medina, OH

Peter Wu, M.D., Houston, TX

Dan Yang, M.D., San Jose, CA

Jessica Michele Yeatermeyer, M.D., Chicago, IL

James Robert Yon, M.D., Jefferson, MA

Amy Younai, M.D., Huntington, NY

Lawrence Yu, M.D., Tustin, CA

Solomon G. Zaraa, D.O., Pepper Pike, OH

Lazaro Victor Zayas Jr., M.D., Cambridge, MA

Asima Ali Zehgeer, M.D., Avon, CT

Zainab Zia, M.B.B.S., Frisco, TX

Janet L Zoch, M.D., Missouri City, TX

## **Child and Adolescent Psychiatry, Part II, 2015**

Jyotsna Adma, M.D., Overland Park, KS

Bamidele Anuoluwa Ajayi, M.D., Bronx, NY

Desiree Theodora Biesheuvel, M.D., Brattleboro, VT

Maryann Booth, M.D., Abingdon, MD

Sonali Bora, M.D., Johns Creek, GA

Kathryn S. Borman, D.O., M.P.H., Lincoln, NE

Catalin Butunoi, M.D., Clinton, NY

Noel Arsenio Cabrera, M.D., Boca Raton, FL

Margaret Mary Casey, M.D., Grosse Ile, MI

Shalini Chawla, M.D., Chicago, IL

Robert Bourke Christian, M.D., Chapel Hill, NC

Kendra Alise Cornwall, D.O., Portland, ME

Percival Lino Cueto, M.D., Lawton, OK

Cat Tran Manh Quyen Dang, D.O., Aliso Viejo, CA

Patricia Diaz, M.D., Pleasant View, TN

Andrew David Diederich, M.D., Dallas, TX

Linda Emieture Edhere, M.D., Chino Hills, CA

Daniel Fallon, M.D., Tampa, FL

Marilyn Griffin, M.D., Chicago, IL

Astrid Bianca Herard, M.D., Tinley Park, IL

Charlotte N. P. Hutton, M.D., Kenner, LA

Isaac George Isaac, M.D., Tampa, FL

Lisa Baeza Johnson, M.D., Flagstaff, AZ

Carlos Jordan Manzano, M.D., Rancho Palos Verdes, CA

Ahmad Zia Khan, M.D., Racine, WI

Timothy Cooper King, M.D., Winston Salem, NC

Ryan Michael Ley, M.D., Reno, NV

Lisamar Maldonado-Hernandez, M.D., Houston, TX

Catherine Josephine Mason, M.D., Napa, CA

Elizabeth Ruel Matern, M.D., Unionville, CT

Matthew Thomas McKenna, M.D., Richmond, VA

Saba Memon, M.D., Sugar Land, TX

Syed Jamal Mustafa, M.D., Bothell, WA

Mark Anthony Novitsky Jr., M.D., Chadds Ford, PA

Atinuke Abidemi Ogunlade, M.D., Horseheads, NY

Munira Esmail Olia, M.D., Media, PA

Elssy Nurys Oms, M.D., Miami, FL

Danielle Parisi, D.O., Staten Island, NY

Mark Anthony Ritter, M.D. R.Ph., Crofton, MD

Hala Saleem, M.D., Tracy, CA

Catherine Gennings Saxbe, M.D., Williamstown, MA

Michael Sheng Young Shen, M.D., Bothell, WA

Raghavendra Rao Siragavarapu, M.D., Chalfont, PA

Maged Sobhy Soliman, M.D., Islip, NY

Maria Malgorzata Szpyt-Domanska, M.D., Fresno, CA

Rebecca Saben Timme, D.O., Ukiah, CA

Aimee Lynn Tischuk, M.D., Deerfield Beach, FL

Manzoor Mustafa Usman, M.D., Stamford, CT

Mary Helen Usubiaga, M.D., Forest Hills, NY

Edgar Manuel Vizcaino, M.D., Allentown, PA

Susan S. Walker, M.D., Boston, MA

Sarah E Walsh, M.D., Grantham, NH

David Dakin Williams, M.D., Ph.D., Nashua, NH

Tyrone Jamar Williams, M.D., Somerville, MA

John Michael Wubbenhorst, D.O., Blue Springs, MO

Jorge Antonio Zapatel, M.D., West Lake Hills, TX

Patrick Jean Zirnheld, M.D., Indianapolis, IN

**Child and Adolescent Psychiatry MOC, April 13, 2015**

Babatunde Kolawole Abolade, M.D., Montgomery, AL

Robert Eugene Alley, M.D., Henderson, KY

Denisse Marion-Landais Ambler, M.D., Muncie, IN

Roselin Arunachalam, M.D., Champaign, IL

Tracy Anthony Asamoah, M.D., Austin, TX

Ruxandra Carmen Badescu, M.D., Huntington, NY

John Ronald Devenick Bell, M.D., Apo, AE

Ranu Boppana, M.D., Somerville, MA

Lisa Dianne Boyd, M.D., Spring, TX

George Thomas Brandt, M.D., Littleton, CO

Karen Michele Brooks, M.D., Albany, OR

Kirstin Ellen Brunner, D.O., Erie, PA

James Blair Bunting Jr., M.D., Richmond, VA

Pamela Ann Campbell, M.D., Springfield, IL

Karen Messer Christensen, M.D., Ogden, UT

Eric David Cohen, M.D., Hartford, CT

Stanley Roger Coleman, M.D., Charlotte, NC

Michael Domingo De Bellis, M.D., Chapel Hill, NC

Lourdes Janette Delgado-Serrano, M.D., Hanna City, IL

Veena Raj Doddakashi, M.D., Bakersfield, CA

M. Bridget Downes, M.D., Greenwich, CT

Elvira Foglia Downs, M.D., Plainsboro, NJ

Denise Ann Dutchak-Parmenter, M.D., Fort Myers, FL



Robert John Edleman, M.D., Dix Hills, NY

Kenneth Alan Ensroth, M.D., Oregon City, OR

John Andrew Faber, M.D., Costa Mesa, CA

Mark Paul Faber, M.D., Upper Montclair, NJ

Alexander Fariborzian, M.D., Gainesville, FL

Caromyr Figueroa Silvestrini, M.D., Blaine, MN

Bonnie Jo Flick, M.D., Beaverton, OR

Carmel Anne Gozum Flores, M.D., Beavercreek, OH

Janice L. Forster, M.D., Swissvale, PA

Wanda Porten Fremont, M.D., Syracuse, NY

Pablo H. Goldberg, M.D., New York, NY

Luis Alberto Gonzales, M.D., White Plains, NY

Laurie Elise Gordon, M.D., New York, NY

Alessia de Paola Gottlieb, M.D., Santa Monica, CA

Jeanne Ellyn Greenblatt, M.D., Burlington, VT

Nichole D. Grier, M.D., Carrboro, NC

Anna Judith Hempstead, M.D., Palo Alto, CA

Thomas Arthur Hicklin, M.D., Pasadena, CA

Sharon Louise Hirsch, M.D., Wilmette, IL

Gary Russell Hudak, M.D., Anacortes, WA

James Joseph Hudziak, M.D., Burlington, VT

Amy Eileen Jones, M.D., Marietta, SC

Shannon Renee Jones, M.D., Evansville, IN

Kristopher Edward Kaliebe, M.D., New Orleans, LA

Wajiha Parveen Karatela, M.D., Ballwin, MO

Himabindu Koneru, M.D., Plymouth Meeting, PA

Louis James Kraus, M.D., Highland Park, IL

Michael Robert Kronen, M.D., Silver Spring, MD

Brian Mark Kubacak, M.D., Maumelle, AR

Suzanne Nicole L'Ecuyer, M.D., Grover, MO

Adam Z. Leczycki, M.D., Ardsley, NY

Patricia Kay Leebens, M.D., New York, NY

William D. Leusink, M.D., Colorado Springs, CO

Michael Alan Litwiller, M.D., Zionsville, IN

Kanchana Mala Madhavan, M.D., Farmington Hills, MI

Ardis Caprice Martin, M.D., Colorado Springs, CO

Robert Kepler Matlack Jr., M.D., Fayetteville, NC

Margaret Alverta McKeathern, M.D., Rockville, MD

Michael Anthony Mennella, M.D., Smithtown, NY

Mohammad Waqar Khan Mohmand, M.D., MPH, Glyndon, MD

Richard H. Morse, M.D., New Orleans, LA

Hemalatha Mukhara, M.D., Ashburn, VA

Sandra Kay Nelson, M.D., Cody, WY

Colleen Joyce O'Rourke, M.D., Sturgeon Bay, WI

Joan Marie Odom, M.D., Newport Coast, CA

Nnenna Kalaya Okereke, M.D., Roanoke, VA

Milagros Delcarmen Olivieri-Lorenzo, M.D., Clearwater, FL

Helen Christina Panarites, M.D., Atlanta, GA

James Adam Parker, M.D., Mercer Island, WA

James Randolph Peacey, M.D., Seattle, WA

Kathleen Susan Perrego, M.D., Scarsdale, NY

Charles Perrotta Jr., M.D., Erie, PA

Terry Gray Pritt, M.D., Baltimore, MD

Rahila Idris Qazi, M.D., Zionsville, IN

Faiza N. Qureshi, M.D., Madison, MS

Sohail Anjum Rana, M.D., Marlton, NJ

Aruna S. Rao, M.D., Baltimore, MD

Kathleen M. Regan, M.D., Midland, MI

Madhvi Phadtare Richards, M.D., Okemos, MI

Carmen Roman, M.D., Menlo Park, CA

Steven R. Rosen, D.O., Centerville, OH

Theresa M. Voissem Ruano, D.O., Riverview, FL

Kiran Fatima Siddiqui, M.D., Irving, TX

Sabina Singh, M.D., New York, NY

Suzanne Ines Starkey, M.D., Marietta, GA

David Steinberg, M.D., Bergenfield, NJ

Eleatha Louise Surratt, M.D., Saint Louis, MO

Daniel Donald Swartz, M.D., Madison, AL

Mimi Win Thein, M.D., Bolton, MA

Brian Hunt Thomas, M.D., Newnan, GA

Christian Conrad Thurstone, M.D., Denver, CO

Scott A. Trail, M.D., Saint Louis, MO

John Eric Vance, M.D., Fincastle, VA

Claudio Manuel Vazquez, M.D., Brooklyn, NY

Louis Angel Velazquez, M.D., South Deerfield, MA

Lee Elizabeth Wachtel, M.D., Baltimore, MD

Robin Barrineau Welsh, M.D., Columbia, SC

Alejandra Wortman, M.D., Stamford, CT

Nancy Sheng-Shih Wu, M.D., Santa Monica, CA

Shahnour Yaylayan, M.D., Orland Park, IL

Rebecca Marie Zarko, M.D., Broadview Heights, OH

**Child and Adolescent Psychiatry MOC, July 1, 2015**

Mohamed Safwat Ahmed, M.D., Webster, TX

Aurangzeb Khan, M.D., Frederick, MD

Cleopatra Ortiz, M.D., West Palm Beach, FL

**Psychiatry Certification, September 24, 2015**

James Olushola Abanishe, M.D., ORO VALLEY, AZ

Atheir Ibrahim Abbas, M.D., New York, NY

Sandy Abdelkedous, M.D., Santa Clarita, CA

Linta Kurian Abraham, M.D., Moore, OK

Syed Khalid Abubaker, M.B.B.S., Las Vegas, NV

Robert Evan Accordino, M.D., Cambridge, MA

Bibhav Acharya, M.D., San Francisco, CA

Sean F. Ackerman, M.D., Burlington, VT

Cathleen Marie Adams, MD, Uxbridge, MA

Jesse Michael Adams, M.D., San Mateo, CA

Ryan Kenric Adams, M.D., Shawnee, OK

Scott Adams, D.O., Charlotte, NC

Oyedolapo Oluwamayowa Adeaga, M.D., old bridge, NJ

Jonathan Adelstein, M.D., Seattle, WA

Kapil Kiran Aedma, M.D., Kansas City, KS

Zehra Nigah Aftab, M.D., Chicago, IL

Nadeem Afzal, M.D., Newark, DE

Taghogho Agarin, M.D., West Plains, MO

Rashi Agarwal, M.B.B.S., Sunnyvale, CA

Vishesh Agarwal, M.D., Philadelphia, PA

Arpit Aggarwal, M.B.B.S., Columbia, MO

Gayane Aghakhanyan, M.D., Glendale, CA

Jose Aguilar, M.D., Moreno Valley, CA

Steven Michael Aguilar, M.D., Long Beach, CA  
Maria E Aguilar Donis, M.D., Wellington, FL  
Maria Elena Aguilo-Seara, D.O., North Wales, PA  
Nicole A. Aguirre, M.D., Jacksonville Beach, FL  
Thor Skuli Agustsson, D.O., Pelham, NH  
Shirrin Ahmadi-Davis, M.D., Brandon, FL  
Ramsey B. Ahmed, M.D., Masury, OH  
Christina Ahn, M.D., New York, NY  
Nicole Frances Aho, M.D., Mount Pleasant, SC  
Vasudha Ahuja, M.D., Valencia, CA  
Zoraya Elena Ahumada Torres, M.D., Houston, TX  
Bolanle O Akinronbi, M.D., Linden, NJ  
Yetunde O Akins, M.D., Hanover, MD  
Keerthi Akkineni, M.D., Saint Louis, MO  
Zainab Al-Dhaher, M.D., New York, NY  
Aaron Joseph Alaniz, M.D., Dickinson, TX  
Venu Gopal Alapati, M.B.B.S., Brooklyn, NY  
Cristina Sophia Albott, M.D., Minneapolis, MN  
Krista Alexander, M.D., Durham, NC  
Jabeen S. Ali, M.D., Downers Grove, IL  
Narmin Aliji, M.D., Los Angeles, CA  
Maria Alikakos, D.O., New York, NY  
Nicole Allen, MD, New York, NY  
Rebecca Allen, M.D., Boston, MA  
Jennifer Alleyne, M.D., Columbia, SC

Yadira Alonso, M.D., Boston, MA  
Tarik Alshaikh, D.O., Las Vegas, NV  
Luis Ramon Alvarado Espada, M.D., San Juan, PR  
Mojgan Amani, M.D., Seattle, WA  
Syed Amad Amanullah, M.D., Aurora, IL  
Maithri Ameresekere, M.D., San Francisco, CA  
Rakesh Rajendra Amin, M.D., Nashville, TN  
Mona Amini, M.D., Chandler, AZ  
Lance Amols, M.D., Coral Springs, FL  
Vivek Anand, M.D., Greenville, NC  
Tasheitha Anazia, M.D., Columbia, SC  
Emaya Anbalagan, MD, Sacramento, CA  
Deepti Anbarasan, M.D., Bronx, NY  
Carl-Erik Andersen, M.D., Laguna Hills, CA  
Kent Douglas Andre, M.D., Vermillion, SD  
Kiana Ann Andrew, M.D., Charleston, SC  
Arun Andrews, M.B.B.S., Pearland, TX  
Joseph Thomas Andrews, M.D., Portland, OR  
Tiffany N Andry, M.D., Pearland, TX  
Aimee Sia Ang, M.D., El Centro, CA  
Benjamin Angarita, M.D., New York, NY  
Cara Angelotta, M.D., New York, NY  
Huma Ansari, M.D., Green Brook, NJ  
Elizabeth Anto, M.D., Brooklyn, NY  
Maria Aponte, M.D., Cleveland, OH



Bonnie Applewhite, M.D., Saint Louis, MO  
Garima Arora, M.B.B.S., Houston, TX  
Husnain Ashraf, M.B.B.S., Plano, TX  
Chima Asikaiwe, M.B.B.S., Binghamton, NY  
Mahboob Ahmad Aslam, M.D., Hamden, CT  
Vera Astreika, M.D., Copley, OH  
Mohamed Ataalla, M.D., El Paso, TX  
Nadir Attiah, M.D., Goldsboro, NC  
Rajni K Aulakh, M.D., New Berlin, WI  
Ngu Wah Aung, MD, Beachwood, OH  
Jaymie Avenido, M.D., Antioch, TN  
Rania Awaad, M.D., Union City, CA  
Sahar Awad, M.D., Lorton, VA  
Michael Alan Aycock, D.O., Austin, TX  
Azeesat Babajide, M.D., Los Angeles, CA  
Ronke L. Babalola, M.D., Milltown, NJ  
Ismail A. Badran, M.D., Mariemont, OH  
Nicolas H Badre, M.D., San Diego, CA  
David Do-young Bae, M.D., Lebanon, NH  
Kara Simone Bagot, M.D., Milford, CT  
Anjam Bahl, M.D., San Francisco, CA  
Emilee Bailey-Offill, D.O., Lexington, KY  
Charlotte Lavettia Baker, M.D., Detroit, MI  
Noel Baker, M.D., Vauxhall, NJ  
Mara Balda, M.D., Tampa, FL

Julio Ballestas, M.D., Milford, CT

Rekha Bandla, D.O., Chicago, IL

Leyla Baran Akce, M.D., Houston, TX

Irina Baranskaya, M.D., Edmond, OK

Katharine Leigh Baratz Dalke, M.D., Philadelphia, PA

Tracy Ann Barbour, M.D., Boston, MA

Tatjana Barisic-Dujmovic, M.D., Mequon, WI

William Barnard, M.D., Boston, MA

Jennifer L. Barnes, M.D., Providence, RI

Yuxiao Elizabeth Barnes, M.D., Memphis, TN

Michael Barnes, M.D., Weehawken, NJ

Elyssa Barron, M.D., Bronx, NY

Jacquelyn Alexandra Barron, MD, Toronto, ON

Lauren Saleeby Barron, M.D., Columbia, SC

Lucas Barton, M.D., Miamisburg, OH

Roopsi Bassi, MD, Jackson, MS

Arnabh Basu, M.B.B.S., Rahway, NJ

Shreyas Baxi, MD, Middletown, NY

Christopher Thomas Bayley, M.D., Colorado Springs, CO

Charles Britton Beasley, M.D., Philadelphia, PA

Marie Lee Beasley, D.O., Chattanooga, TN

Alexis Beattie, M.D., Cleveland Heights, OH

Jessica Ann Beauchene, M.D., Sacramento, CA

Kyle Joseph Bechaz, M.D., Los Angeles, CA

Brandon Robert Beckman, D.O., Denton, TX

Louis Beckman, M.D., Washington, DC

Morgyn Beckman, M.D., Portland, OR

James Bedford, M.D., Sacramento, CA

Jose Guillermo Bejarano, M.D., New Haven, CT

Alyson Marie Bell, M.D., Columbus, OH

Jacqueline M Bell, D.O., Minot, ND

Tiffani Lynee Bell, M.D., Winston Salem, NC

Ademola Bello, M.B.B.S., Hummelstown, PA

Erin Fraser Benesch, D.O., Irvine, CA

Patrick Joseph Bennet, D.O., Las Vegas, NV

Frederick Christian Bennett, MD, Palo Alto, CA

Lori Bennett-Penn, M.D., New York, NY

Karla Benzl, M.D., San Francisco, CA

Silvia Bernardi, M.D., New York, NY

Anya Bernstein, M.D., Natick, MA

Julie N Bernstein, D.O., Daphne, AL

Obianuju Jennifer Obi Berry, M.D., New York, NY

Umesh Chander Bhandari, M.D., Brandon, MS

Amritha Bhat, M.B.B.S., Redmond, WA

Padam Bhatia, M.D., Miami, FL

D. Harshad Bhatt, M.D., Ph.D., New York, NY

Sureshkumar Himatlal Bhatt, M.D., FCCP, Mandeville, LA

Abesh Kumar Bhattacharjee, M.B.B.S., La Jolla, CA

Debanjana Bhattacharya, M.D., Sioux Falls, SD

Sanaa Bhatti, M.D., New York, NY

Hemant Kumar Bhimasani, M.D., State College, PA

Iffat Bhuiyan, M.D., Atlanta, GA

Inci Bijan, M.D., Jersey City, NJ

Sorin Bircea, M.D., Woodside, NY

Meredith Birdwhistell, M.D., Scottsburg, IN

Amy Bissada, D.O., Rochester, NY

Whitney Black, M.D., Portland, OR

Mary Paugh Blackmon, M.D., Hartsville, SC

Mark Erik Blair, M.D., Worthington, OH

Michael Blanchard, M.D., Kenner, LA

Kecia Ann Blissett, D.O., South Orange, NJ

Adam Bloom, M.D., Charleston, SC

Philip Miles Blumenshine, M.D., Hartford, CT

Aaron Justin Bobb, M.D., Seattle, WA

Ryan Bochacki, M.D., Pittsburgh, PA

James Bodnia, D.O., Iowa City, IA

Matthew Todd Boire, M.D., Bend, OR

Emily Bomasang-Layno, M.D., Falls Church, VA

Charles Anthony Bongiorno, M.D., Rock Springs, WY

Daniel Bonnici, M.D., Los Angeles, CA

Ramnarine Boodoo, M.B.B.S., Albuquerque, NM

Xenia Borue, M.D., Pittsburgh, PA

Ben Lare Boswell, M.D., Philadelphia, PA

Marc Bouchard, D.O., El Paso, TX

Ann M Bowden, M.D., Sioux Falls, SD

Stephen Ronald Douglas Bo Brackett, M.D., Atlanta, GA

Neil J Brahmhatt, D.O., Milwaukee, WI

Kevin Brazill, D.O., Urbana, IL

Keri Oxley Brenner, M.D., Boston, MA

Marin Broucek, M.D., Omaha, NE

Megan Elizabeth Browder, M.D., Knoxville, TN

Cameron Brown, D.O., Perrysburg, OH

Kara Brown, M.D., Cambridge, MA

Kimberly Michele Brown, MD, Los Angeles, CA

Megan Brown, MD, Portland, OR

Rebecca Brown, D.O., Cincinnati, OH

Vladimir Anatolyevich Brown-Zheltkov, M.D., Roanoke, VA

Charles Thomas Browning, M.D., Raleigh, NC

Andrea Brownridge, M.D., Oviedo, FL

Christopher John Brubaker, M.D., Seattle, WA

Heather Ann Bruce, M.D., Baltimore, MD

Nathan Ernest Bruce, D.O., Pacific Junction, IA

Paul Abbott Bryant, M.D., Lebanon, NH

Theresa Bui, D.O., Galveston, TX

Syed Muhammad Ali Imran Bukhari, M.D., Toledo, OH

Jason Richard Burns, M.D., Wauwatosa, WI

Christopher Burritt, D.O., Philadelphia, PA

Ibrahim Busnaina, M.D., Los Angeles, CA

Thomas Nordling Butler, M.D., San Mateo, CA

Kirsten Alyssa Butz, M.D., Rapid City, SD

David Charmoy Buxton, M.D., Richmond, VA

Angela Byron, D.O., Dayton, OH

Zuraima Taili Caldera, M.B.Ch.B., Round Rock, TX

Seema Calip, M.D., Los Angeles, CA

Richard Callahan, M.D., Miami, FL

Todd Richard Callister, M.D., Madison, WI

Richard Ducusin Camacho, MD, Scottsdale, AZ

Clacy Camel, DO, Jackson, MS

Marc Campbell, D.O., Binghamton, NY

Amelia Marie Oliva Campos, M.D., Corbin, KY

Ali Nelson Canton Vafabakhsh, M.D., Ocala, FL

Hong Cao, M.D., Chicago, IL

Ying Alisa Cao, M.D., Boston, MA

Noah Capurso, M.D., New Haven, CT

Andrea Carcamo, D.O., Delran, NJ

Vincent Caringi, MD, Cleveland, OH

Richard H Carlson, M.D., Nashville, TN

Rebecca Luisa Carrillo, M.D., Aromas, CA

Andrea Carter, M.D., Los Angeles, CA

Desiree Morrell Carter, M.D., New Orleans, LA

Jolie Simone Carter, M.D., New York, NY

Kia Lashaun Carter, M.D., Douglasville, GA

Krystine D Carter, M.D., Marlton, NJ

Bridget Casey-Leavell, DO, Cincinnati, OH

Catherine Cashman, D.O., New Orleans, LA

Roberto Castanos, M.D., Aliso Viejo, CA  
Enrico Guanzon Castillo, M.D., Los Angeles, CA  
Jorge Ernesto Castillo, M.D., Syracuse, NY  
Giuliana Cosma Centurion, D.O., Cincinnati, OH  
Raj Lachman Chablani, M.D., New York, NY  
Ashley Chaffin-Dempsey, MD, Fort Hood, TX  
Eric Chaghouri, M.D., West Hollywood, CA  
Hong Chai, M.B.B.S., Friendswood, TX  
David Chaiffetz, M.D., Port Orange, FL  
Shawn Chambers, M.D., Baltimore, MD  
Eric Chan, M.D., San Francisco, CA  
Nicholas Yik-Fung Chan, M.D., San Diego, CA  
Suresh Chand, M.B.B.S., Allston, MA  
shanel chandra, MBBS, syracuse, NY  
Subhash Chandra, M.B.B.S., Jamaica, NY  
Charukesi Chandrasekaran, M.B.B.S., Pearland, TX  
Ann Chandy, M.D., Camden, NJ  
Joshua Kora Chandy, D.O., Evans, GA  
Joy Chang, M.D., Bethesda, MD  
San Kuo Chang, M.D., Gainesville, FL  
Katherine Marie Chapel, M.D., McAllen, TX  
Lindsay Marie Chapman, D.O., Frisco, TX  
Mark Chapman, M.D., Chicago, IL  
Isaiah Chase, M.D., New York, NY  
Monika Chaudhry, M.D., Los Angeles, CA

Jaimini Chauhan-James, MD, College Point, NY

GOSHAWN CHAWLA, M.D., Gilbert, AZ

Courtney Chellew, D.O., Bethlehem, PA

Jie Chen, M.D., Seattle, WA

Kathryn Chen, M.D., Seattle, WA

Meadow Bifen Chen, M.D., Farmington, CT

Zuomin Chen, M.D., Birmingham, AL

Pu Cheng, M.D., Indianapolis, IN

Jasleen Chhatwal, M.B.B.S., Tucson, AZ

Ryan Chiarella, D.O., Fort Campbell, KY

Kaleena Chilcote, M.D., Jamaica Plain, MA

Mabel Lee Chin, M.D., Gardena, CA

Jang Cho, M.D., Silver Spring, MD

Vicky Chodha, M.D., Bayside, NY

Kang Won Mathew Choi, D.O., Arcadia, CA

Justin Chou, M.D., Philadelphia, PA

Anita Chu, MD, Bridgeport, CT

Soyeun Chu, D.O., Colorado Springs, CO

Paul S Chung, M.D., Fullerton, CA

Richard Dong-Youl Chung, M.D., Tucson, AZ

Jamie Cichon, M.D., Daniels, WV

Cristian Dan Ciora, M.D., Englewood, NJ

Richard Anthony Clarey, M.D., Chicago, IL

Adrienne Nicole Clark, M.D., Philadelphia, PA

Patrick Cleary, M.D., Media, PA



Theresa A Clemmons, D.O., Coralville, IA  
Ethel Marie Cobbett, M.D., Memphis, TN  
Tracy Coffman, M.D., Weston, WV  
Meagan Elizabeth Cogbill, M.D., Aylett, VA  
Cerrone Akil Cohen, M.D., Durham, NC  
Alexis Cohen-Oram, M.D., Worcester, MA  
Johnathan Todd Coleman, M.D., Chicago, IL  
Ashleigh Colin, M.B.Ch.B., New Haven, CT  
Michael Colin, M.D., Brooklyn, NY  
Stephanie Collier, M.D., Boston, MA  
Giancarlo Colon Vilar, M.D., New York, NY  
Erika Kristina Concepcion, M.D., Tinton Falls, NJ  
Milangel Thaymee Concepcion, M.D., Washington, DC  
Mary Conlon, M.D., New York, NY  
Michael Conn, MD, Marion, IN  
Ryan K Conner, D.O., Broomfield, CO  
Virginia Contreras, M.D., Englewood, NJ  
Sarah Cook, M.D., Atlanta, GA  
Ryan Allyn Coon, MD, Saint Paul, MN  
John Nathan Copeland, MD, Chapel Hill, NC  
Caitlin Elizabeth Corbitt, M.D., Bridgeport, WV  
Asa Cordle, M.D., Charleston, SC  
Peter Andrew Corpus, M.D., Highland Heights, OH  
Daniel Cote, DO, Negaunee, MI  
Aronica Cotton, M.D., Baltimore, MD

Melisa Clark Couey, M.D., Ooltewah, TN  
Alisha Coulson, M.D., Salina, KS  
Maria Carolina Court, M.D., San Diego, CA  
Carmela Rosa Cowdrey, DO, Bristol, IN  
Lara Cox, M.D., New York, NY  
Jessica Lynn Crawford, M.D., Palo Alto, CA  
Adam Roy Critchfield, M.D., New York, NY  
Micah Croft, M.D., Provo, UT  
Angela Cross, M.D., Brooklyn, NY  
Bridgid Crowley, M.D., Seattle, WA  
John Michael Cruz, M.D., Walnut Creek, CA  
Christopher Stephen Cselenyi, M.D., New York, NY  
Ana Cuebas, M.D., Fayetteville, GA  
Cameron Blake Culver, M.D., Dallas, TX  
Sahana Keerthi D'Silva, M.D., Seattle, WA  
Erin Dainer, M.D., Charlotte, NC  
Ishani H Dalal, D.O., Chicago, IL  
Majed Dalloul, M.D., Gurnee, IL  
Lilia Danilov, M.D., New Brunswick, NJ  
Shaleah Dardar, M.D., Aurora, CO  
Navin Vashu Dargani, M.D., New York, NY  
Smita Das, M.D., Mountain View, CA  
Arnab Datta, M.D., New York, NY  
Wilbur Dattilo, M.D., Salt Lake City, UT  
Akiva Daum, M.D., Brookline, MA

Julia Davidoff, M.D., Encino, CA

Michelle Davids, DO, Cambridge, MA

Asha Sherald Davis, MD, Miami, FL

Tapsi Dayanand, M.B.B.S., New Haven, CT

Eswar K. Dayanandam, M.D., Paoli, PA

Patricia De Marco Centeno, M.D., Huntington Beach, CA

James Colby Decker, M.D., Portsmouth, VA

Michael A Dekker, D.O., Tucson, AZ

Adriane Melissa dela Cruz, M.D., Dallas, TX

Damon Alexander DeLeon, M.D., Riverside, RI

Rene Delgadillo, MD, Bakersfield, CA

Brandon DeLiberato, D.O., Cleveland, OH

Megan Patricia Della Selva, M.D., Baltimore, MD

Benjamin C. DeLucia, M.D., Bronxville, NY

Gerald Alan DeMasters, M.D., Salem, VA

Angela Demehri, M.D., Ann Arbor, MI

Adam Demner, M.D., New York, NY

Manoela Fonseca Denman, M.D., Dallas, TX

Charletta Ann Dennis, M.D., Detroit, MI

Evelyn A. Dennison, M.D., Seattle, WA

Pravesh Deotale, MD, Springfield, IL

Warren Keith DePonti, D.O., Lexington, KY

Thomas Jack DePrima, M.D., New York, NY

John Alan Derenne, M.D., Fpo, AP

Shivan Desai, M.D., Chester, VA

Simon Forbes Desjardins, M.D., New York, NY

Allison Beth Deutch, M.D., New York, NY

Jane Catalina Dever, M.D., Minneapolis, MN

Jade Alysha DeWitt, M.D., New York, NY

Swati Dhankikar, M.B.B.S., Fargo, ND

Romika Dhar, M.B.B.S., Philadelphia, PA

Swapna Karisma Dhillon, M.D., Hamilton, NJ

Selene Diaz, M.D., Bakersfield, CA

Yanet Diaz, M.D., Carolina, PR

Aryeh Dienstag, M.D., Far Rockaway, NY

Natalie Do, D.O., San Diego, CA

Jimmy Doan, MD, Huntington Beach, CA

Tyler Dodds, M.D., Lee, MA

Lee Dolowich, M.D., Tustin, CA

Sarah Domb, M.D., Pasadena, CA

Lyndsey Dominguez, MD, North Little Rock, AR

Feng Dong, M.D., Rockville, MD

Jennifer Ann Donovan, M.D., Cedar Rapids, IA

Thomas Draschil, M.D., Provo, UT

Tina Marie Drury, M.D., Columbia, MO

Dianne Duffey, M.D., Westport, CT

Brandon Duft, M.D., Portland, OR

Kenneth Curtis Dunstone, M.D., Port Austin, MI

Pelin Duzenli, M.D., Newport News, VA

Margaret Amanda Ege-Woolley, M.D., Little Rock, AR

Jessica Eisenberg, M.D., New York, NY

Vijayabharathi Ekambaram, M.B.B.S., Washington, DC

Nadia Mohamed El Fangary, MD, Dublin, OH

Saria Mounir El Haddad, M.D., Medford, MA

Adam Samuel Elias, M.D., Rye Brook, NY

George Elias, M.D., Los Angeles, CA

Robert P Elias, M.D., Chula Vista, CA

Darrell Andrew Elliott, M.D., Memphis, TN

Esmaeil Emami, M.D., Bloomfield Hills, MI

Henry Emerle, M.D., Davenport, IA

Okon Atte Enyenihi, M.D., Knoxville, TN

Elizabeth Jane Erickson, D.O., Aurora, CO

Jennifer Marie Erickson, D.O., New York, NY

Laura Eskander, M.D., Baltimore, MD

Pamelynn Ganal Esperanza, MD, New York, NY

Betsy C. Estefan, M.D., Bronx, NY

Daniel Adrian Evans, M.D., Albuquerque, NM

Iris Fadlon, M.D., Chestnut Hill, MA

Sarah Faeder, M.D., Pittsburgh, PA

Shama Faheem, M.D., Canton, MI

Sajid Faizi, M.D., Cottonwood Heights, UT

Sarah Marie Fajgenbaum-Teslja, M.D., Hoboken, NJ

Elizabeth Falchook, M.D., Chapel Hill, NC

Sarah Falcon, M.D., Coralville, IA

Andrew Farkas, M.D., Atlanta, GA

Seth Farnsworth, M.D., Apo, AP

Nima Fayazmanesh, M.D., Dana Point, CA

Sarah Feenstra, D.O., Kihei, HI

Shana Feibel, D.O., West Chester, OH

David Fein, M.D., New Orleans, LA

Genny I Feinberg, D.O., New York, NY

William Carson Felkel II, M.D., Winston Salem, NC

Richard Feng, M.D., San Francisco, CA

Usama Feroze, M.B.B.S., Washington, DC

Tania Fiacco, M.D., Bellevue, NE

Christopher Fischer, M.D., West Hollywood, CA

Naomi Fishman, M.D., Portland, OR

Anna Fiskin, M.D., San Francisco, CA

Noreen Flanagan, MD, Scarborough, ME

Ashleigh Fleming, M.D., Shreveport, LA

Katrina Fletcher, M.D., Philadelphia, PA

Christina Vera Floreani, M.D., Oak Park, IL

Caralyn Jean Floyd, DO, Orange, TX

Alexandra Flynn, M.D., PhD, Wichita, KS

Albert Thendore Fombu, MD, Hummelstown, PA

Heath Benton Foreman, D.O., Temple, TX

Chantal Forfota, M.D., San Francisco, CA

Heather Forouhar Graff, M.D., West Hartford, CT

Margaret Ann Forszpaniak, DO, Birmingham, AL

Amanda M Forystek, M.D., North Liberty, IA

Cara Fosdick, M.D., Ann Arbor, MI

Joshua Dozier Fowler, M.D., Irmo, SC

Matthew Jon Frankel, M.D., Burlington, VT

Bethany Franklin, M.D., Dillsburg, PA

Alan Joseph Frascoia, M.D., Brooklyn, NY

Alaric Donham Frazier, M.D., Coalinga, CA

Suzanna Lynn Freerksen, MD, Mountain View, CA

Liberty J. Fritzler, M.D., Hudson, OH

Erik Frost, M.D., Georgetown, TX

Xueling Fu, M.D., Dallas, TX

Andrew P Fuller, M.D., Chestnut Hill, MA

Brian E Fuller, M.D., Nashville, TN

Annie Naik Gadiparthi, M.D., Germantown, TN

Mia Maria Galioto, M.D., Cuba, MO

Andrea Gallardo, MD, San Jose, CA

Alexander Philip Gamble, M.D., Kansas City, MO

Jason Lerand Gandy, M.D., Columbia, SC

Nohazarahit Maria Garcia Caraballo, M.D., warwick, PA

Maria Gabriela Garcia Vassallo, M.D., San Juan, PR

Jennifer Ellen Gardner, M.B.Ch.B., Piedmont, CA

Laura Gardner, M.D., Bronx, NY

Aditi Garg, M.B.B.S., Minneapolis, MN

Michael Brandon Garland, M.D., New Haven, CT

Allison Hersey Garrett, MD, Honolulu, HI

Kristina Grimbball Gaud, M.D., Cambridge, MA

Rishi Gautam, M.B.B.S., Jersey City, NJ

Smita Gautam, MD, Chicago, IL

Richard Cecil Geary III, M.D., Morgantown, WV

John Gentry, M.D., Charleston, SC

Alyssa Williams George, M.D., Chapel Hill, NC

Lauren Gerlach, D.O., Ann Arbor, MI

Liliya Gershengoren, M.D., New York, NY

Kayla Annette Gertsema, M.D., Austin, TX

Celsius-Kit Gesmundo, M.D., Tempe, AZ

Sadia Abdul Ghaffar, D.O., Clovis, CA

Sogand Ghassemi, M.D., Rochester, MN

Krishnendu Ghosh, M.D., Springfield, MO

Jennifer Reth Giampaolo, M.D., Plano, TX

Edan Gilat, M.D., Delaware, OH

Poonamdeep Gill, M.D., Chicago, IL

Carrie Gillett, M.D., Canton, MI

Cynthia Gillikin, M.D., Atlanta, GA

Artha Gillis, M.D., Los Angeles, CA

Jack London Gills, M.D., Stockton, CA

Yelena Gimelshteyn, M.D., Baltimore, MD

Andreanne Gingras, M.D., Charlottesville, VA

Allison L Giordano, M.D., Valhalla, NY

Yankel Joseph Girshman, D.O., Staten Island, NY

Julianne Marie Giust, M.D., Indianapolis, IN

Zachary Joseph Gleeson, D.O., East Lansing, MI



Olga Godina, M.D., Sammamish, WA  
Elihu Godshalk, M.D., Cincinnati, OH  
Joshua James Goergen, MD, Indianapolis, IN  
Katherine Rice Goettsche, M.D., New York, NY  
Anupriya Gogne, M.B.B.S., Jersey City, NJ  
Nisha Sudhir Gokhale, M.D., Oak Brook, IL  
Benjamin Goldberg, M.D., Sacramento, CA  
Matthew A Goldenberg, D.O., Santa Monica, CA  
Gerhard Gomez, M.D., Tucson, AZ  
Britt Gonsoulin, M.D., Bainbridge Island, WA  
Nina Gonzales, M.D., Albuquerque, NM  
Alberto Luis Gonzalez, M.D., Wallingford, CT  
Melanie Gonzalez, M.D., Sacramento, CA  
Zane Stephen Gooding, D.O., Durham, NC  
Vikram Manjunath Gopal, D.O., Mount Juliet, TN  
Margaret Goracy, M.D., Atlanta, GA  
Viral Goradia, M.B.B.S., Bronx, NY  
Amanda Andrea Gorecki, D.O., Smithtown, NY  
Eric Gorinstein, M.D., Great Neck, NY  
Gabrielli Encarnacion Gorospe-Huber, M.D., Albany, NY  
Purnima Gorrepati, M.D., Burr Ridge, IL  
Jared Gorsuch, D.O., La Crosse, WI  
Gopinath Gorthy, MD, Saint Louis, MO  
Dorothy Gotlib, M.D., Ann Arbor, MI  
Zinovi Goubar, M.D., Sagamore Hills, OH

Rashi Govil, M.D., Forest Hills, NY

Tracy G Grabman, M.D., Seabrook Island, SC

Sabrina Gratia, D.O., North Babylon, NY

Joanna Elizabeth Gratton, DO, Scarborough , ME

Ernest Alexander Graypel, M.D., Saint Louis, MO

Deanne Elizabeth Grayson, D.O., St Augustine, FL

Gabriella Francesca Greco, D.O., Lake Bluff, IL

Jared Greenberg, M.D., Los Angeles, CA

Jonathan David Greenberg, M.D., Vacaville, CA

Adam R Greenlee, M.D., Burlington, VT

Samuel Greenstein, M.D., Cincinnati, OH

Karrisa Grellner, M.D., Ashland, MO

Lubna Grewal, M.D., Brunswick, OH

Jean Whitney Griffith, M.D., Riverside, CA

Kate Hilary Grossman, M.D., Seattle, WA

Christine Grundeman, D.O., Chicago, IL

Nicole Alexis Guanci, M.D., Bloomfield, NJ

Christopher Guedry, M.D., Lafayette, LA

Jose Armando Guerra-Valencia, M.D., South Miami, FL

Murtuza Zakir Gunja, M.D., Jamaica, NY

Yu-Heng Guo, M.D., Philadelphia, PA

Nihit Gupta, M.B.B.S., Minneapolis, MN

Seema Anjali Gupta, M.D., Plano, TX

Tuhin Gupta, M.B.B.S., Forest Hills, NY

Tamar Lea Gur, M.D., PhD, Bexley, OH

Tina Gurnani, M.D., New York, NY

Bindu Gutti, M.D., Latrobe, PA

Khanh Nguyen-Van Ha, M.D., Atlanta, GA

Arzoo Habib, M.D., Wyomissing, PA

Nadia Elisabeth Haddad, M.D., Redwood City, CA

Jarred Hagan, M.D., Waldorf, MD

Brian James Haigh, M.D., Los Alamos, NM

Sheryl Hakala, M.D., Tampa, FL

Tobias Bernhard Halene, M.D., Brooklyn, NY

James Arthur Halgrimson, D.O., Austin, TX

Jeffrey J. Hall, M.D., Fitchburg, WI

Elsa Kristen Haloman, M.D., Seattle, WA

Jessica Halpern, M.D., White Plains, NY

Allan Hamby, M.D., Charlottesville, VA

Elizabeth Hamlin, M.D., Brookfield, WI

Mazen Hamoudi, MD, Augusta, ME

Shaojie Han, M.D., Short Hills, NJ

Yujean Han, D.O., Lebanon, NH

Danish Hangora, M.D., Niles, IL

Ryan Matthew Hardman, MD, Salt Lake City, UT

James Michael Harper, M.D., Arlington, VA

Oliver Louis Harper, M.D., New York, NY

Amanda B Harrington, M.D., Columbia, MO

Jamila Helen Harris, M.D., Everett, MA

Brian Hart, M.D., Indianapolis, IN

Staci Hartman, D.O., San Antonio, TX

John Hartmann, M.D., San Francisco, CA

Matthew Leo Hartzell, M.D., Brooklyn, NY

Robert Case Harvey, M.D., Baton Rouge, LA

Sameer Hassamal, M.D., LaVerne, CA

Zachary Seville Hatch, M.D., Camarillo, CA

Katie Izumi Hatsushi, M.D., San Diego, CA

Abigail Hawkins, M.D., Brooklyn, NY

William Brendon Haynal, M.D., Lebanon, NH

Maryam Helen Hazeghazam, MD, Mesa, AZ

Christopher Scott Healey, M.D., San Antonio, TX

Joseph Malietoa Heath, M.D., Houston, TX

Jean Marie Helmbright, MD, Norman, OK

Amanda Leigh Helminiak, M.D., Houston, TX

Heather Elecia Helzer, M.D., Huntington Woods, MI

Jonathan Michael Hendricks, M.D., De Pere, WI

Rebecca Cappel Hendrickson, M.D., Seattle, WA

Tara Ashley Henschel, M.D., Spring, TX

Edgar Ivan Hernandez, M.D., Washington, DC

Sarah Herold, M.D., Brookline, MA

Marta Herschkopf, M.D., New York, NY

Sarah Herts, D.O., Baltimore, MD

Douglas J Hess, D.O., Sioux Falls, SD

Toni Hesse, M.D., Slc, UT

Laura Jennette Hesselink, D.O., Rockville Centre, NY

Nicholas Heyne, M.D., Decatur, GA

Amy Hilty, M.D., Piscataway, NJ

Lisa French Hinchman, M.D., West Bloomfield, MI

Alexis Sydney Hinds, M.D., Los Angeles, CA

Michael Hipolito, M.D., San Francisco, CA

Elena Marie Hissett, M.D., Copley, OH

Georges Antoine Hneich, MD, Charleston, SC

Pochu Ho, M.D., Westport, CT

Katie Hoeveler, MD, philadelphia, PA

Micah Hoffman, M.D., Napa, CA

Charlotte Scott Hogan, M.D., Boston, MA

Kevin T Holleman, D.O., Honolulu, HI

Amanda Lynn Holloway, M.D., Washington, DC

Carrie Holmberg, MD, PhD, Redwood City, CA

Patrice Janell Holmes, M.D., New Haven, CT

Elizabeth Homan, M.D., duluth, MN

Kristin Homburg, M.D., Denver, CO

Janella Hong, M.D., Jackson Heights, NY

Violette Hong, M.D., San Francisco, CA

Chad Alan Hooten, M.D., Austin, TX

Christopher Ray Hope, M.D., Ridgeland, MS

Patrick Chang Hou, M.D., Brooklyn, NY

Paul Leonard Houser, MD, Cincinnati, OH

Jessica Howsley, M.D., SLC, UT

Xiaojue Hu, M.D., Brooklyn, NY

Matthew Hughes, M.D., Temple, TX

Ruth Marie Huhn, M.D., Denver, CO

Elena Hunanyan, M.D., Glendale, CA

Paul Hung, M.D., San Marino, CA

Scott Hunter, M.D., Los Angeles, CA

Asad Raza Hussain, M.D., Monroe Township, NJ

Nadeem Hussain, M.B.B.S., Bronx, NY

Jessica Hutto, M.D., Dallas, TX

Olakanmi Gbenga Igbekele, M.B.Ch.B., SUGARLAND, TX

Joseph-Pearl Immanuel, M.D., Somerville, MA

Oleg Isakov, M.D., Forest Hills, NY

Kathleen McWhirter Isbell, M.D., Yakima, WA

Malak Waheb Yossef Iskandar, D.O., Roanoke, VA

Brandon Ito, M.D., New York, NY

Kateryna Ivanova, D.O., Dallas, TX

Anand Vaidyanathan Iyer, M.D., San Francisco, CA

Joshua Jabez, M.D., Salt Lake City, UT

Lamis Jabri, M.D., Lathrup Village, MI

Jon Corey Jackson, MD, Richland, MS

Peter Jackson, M.D., Waltham, MA

Richard DeWitt Jackson, M.D., Charlottesville, VA

Claire Louise Jackson-Rabinowitz, D.O., New York, NY

Natalie Jacobowski, M.D., Boston, MA

Angela Marie Jacobs, M.D., Harrisburg, PA

Michael Jacobs, M.D., Miami Beach, FL

Niama Elizabeth Jacobs, M.D., West New York, NJ

Kiranben J. Jadeja, M.D., Edison, NJ

Sneha Prakash Jadhav, M.D., Frederick, MD

Pavel Jalynytchev, M.D., Waltham, MA

Monique James, M.D., San Francisco, CA

Justin Paul Jamison, M.D., Nashville, TN

Shraddha Jani, M.D., Philadelphia, PA

Megan Janoff, M.D., New Haven, CT

Christina Jane Jarosch, M.D., Minneapolis, MN

Arash Javanbakht, M.D., Ypsilanti, MI

Ashwin Jayachandran, MD, Clarendon Hills, IL

Surani Amala Jayaratna, M.D., Anaheim, CA

Rebeca Cecilia Jefferson, M.D., DeForest, WI

Willough Jenkins, MD, Solana Beach, CA

Marisa Leigh Jennings, M.D., San Antonio, TX

Sara Ingrid Jeurling, M.D., Baltimore, MD

Jason Ming Jian, M.B.B.S., Marietta, GA

Anish John, M.D., Springfield, IL

Brandon Johnson, M.D., NY, NY

Ellyn Marie Johnson, MD, Alexandria, VA

Taranjeet S Jolly, M.D., Baltimore, MD

Caroline Jones, M.D., Pittsburgh, PA

Melissa Beth Jones, M.D., Houston, TX

Allison Elizabeth Jordan, M.D., Winston Salem, NC

Ayana Jordan, M.D., New Haven, CT

Elizabeth Anne Jordan, M.D., Seattle, WA  
Heather Joseph, D.O., Pittsburgh, PA  
Karen Joseph, MD, Dearborn, MI  
Pierre Luckner Joseph, MD, Rowlett, TX  
Jeet Joshi, M.D., Lexington, KY  
Yassir Joudaane, MD, Waterloo, ON  
Jose Andres Jovel, M.D., Miami Beach, FL  
Sonia Marie Joy, M.D., New Haven, CT  
Renz Jarrett Juaneza, M.D., Woodbridge, CT  
Grace Mitu Juarez, M.D., Beverly Hills, CA  
Adalia Jun-O'Connell, M.D., Worcester, MA  
Sheril Kalarithara, M.D., Atlanta, GA  
Rana Kaleemullah, M.D., Metairie, LA  
Angela Christine Kallis, M.D., Winterville, NC  
Ippolytos Andreas Kalofonos, M.D., Los Angeles, CA  
Sana Asif Kamal, M.B.B.S., Centerville, VA  
Peter Young Kang, DO, Cape Elizabeth, ME  
Mehr Nasir Karamat, M.D., Minneapolis, MN  
Ariela Ora Karasov, M.D., East Palo Alto, CA  
Jyothsna Karlapalem, M.D., Tarrytown, NY  
Ethan Forrest Karsen, M.D., Evanston, IL  
Adam Jacob Karz, M.D., New York, NY  
Fatima Kasiah, M.D., Birmingham, AL  
Kurt Kastenholz, M.D., Chicago, IL  
Manpreet Kaur, M.B.B.S., Manchester, CT



Sonya Neda Kaveh, MD, Woodbridge, CT

Tina Kaviani, M.D., Dallas, TX

Suraya Kawadry, M.D., Sunny Isles Beach, FL

Natalia Kazakevich, M.D., Houston, TX

Hala Kazanchi, M.B.Ch.B., La Jolla, CA

Daniel Brian Keaton, M.D., Ashtabula, OH

Erica Corinne Keen, M.D., New York, NY

Abigail Keenan, D.O., South Portland, ME

Katie Keller, D.O., Beverly Hills, MI

Jill Amelia Kelly, M.D., Columbia, MD

Jennifer Lynn Kemper, M.D., Cary, NC

Rachel Suzanne Kester, D.O., Cambridge, MA

Steve Khachi, M.D., Menlo Park, CA

Vladimir Khalafian, M.D., La Mesa, CA

Mohammad Rafiq Khan, M.D., Stamford, CT

Nida Khan, M.D., Geln Oaks, NY

Umar Khayyam, M.D., Lancaster, PA

Anbreen Khizar, M.B.B.S., Brooklyn, NY

Naveed Riaz Khokhar, M.B.B.S., Beachwood, OH

Gagandeep Khurana, MD, Alexandria, VA

Christen L. Kidd, M.D., New York, NY

Attiya Kidwai, M.B.B.S., York, PA

Eun Ha Kim, M.D., Albany, NY

Paul Moonwhan Kim, M.D., Baltimore, MD

Seong-Hun Kim, M.D., Seattle, WA

SueAnn Kim, M.D., Dover, MA

Carissa Alexandra Kindy Bidot, M.D., Mayaguez, PR

William Nicholas King, M.D., Omaha, NE

Holly Kinget, M.D., Brandon, MS

Brent M Kious, M.D., Salt Lake City, UT

Shana Camille Kirby, M.D., Tampa, FL

Kirstin Barrow Kirschner, M.D., Wauwatosa, WI

Jonathan Ariel Kirsten, M.D., Brooklyn, NY

Steven Michael Kleiner, M.D., Brookline, MA

Seth J. Kleinerman, M.D., New York, NY

Kelly Kleinert, M.D., New York, NY

Seth Knight, M.D., Salt Lake City, UT

Adam Knowles, M.D., Yonkers, NY

Thomas John Knutson, M.D., Shawnee, KS

Lauren Elizabeth Koehler, M.D., New York, NY

Natasha Kohli, M.D., Prior Lake, MN

Annaliese Marie Koller Shumate, D.O., Mequon, WI

Scott Thomas Koski, M.D., Boulder, CO

Felicitas Koster, D.O., Atlanta, GA

Biana Kotlyar, M.D., Milwaukee, WI

Julia Krankl, M.D., Oak View, CA

Greta L Krause, D.O., Indianapolis, IN

Anna Kravtsov, D.O., Fort Lee, NJ

Bassem Hussein Krayem, M.B.Ch.B., Ann Arbor, MI

Timothy Robert Kreider, M.D., New York, NY

Stephen Judd Krieg, M.D., Dix Hills, NY

Rebecca A. Krill, M.D., Saint Louis Park, MN

Arun Krishnan, M.B.B.S., Brooklyn, NY

Katherine Krive, D.O., Lansing, MI

Rajnishpaul Kaur Kular, M.D., Burr Ridge, IL

Gaurav Kulkarni, M.B.B.S., Columbia, MO

Deepak Kumar, M.D., Los Angeles, CA

Nihit Kumar, M.B.B.S., Little Rock, AR

Arundhuti Kundu, M.D., Tucson, AZ

Anne Kwon, M.D., LaGrangeville, NY

Grace Eun Kwon, D.O., Hamden, CT

Derek James LaBere, MD, Lake Elmo, MN

Sipra Laddha, MD, Atlanta, GA

Jacquelyn Michele LaGrone, M.D., Dallas, TX

Matthew Peter Lahaie, M.D., Boston, MA

Stacey Allison Laird, M.D., Mission Hills, KS

Rachna Lal, M.D., Oakland, CA

Pankaj Lamba, M.D., Morgantown, WV

Matthew Lang, D.O., Pittsburgh, PA

Julie Anne Lange, M.D., La Mesa, CA

Jane Cyrena Lanier, M.D., Boston, MA

Teresa Lanza di Scalea, M.D., Barrington, RI

Anna Terajewicz LaRose, M.D., Brookline, MA

Catherine Cody Larson, M.D., Austin, TX

Crystal Larson, D.O., Bend, OR

Rian Laub, M.D., Yorktown, VA  
Kyle N Lavin, M.D., Nashville, TN  
Christopher Brent Lawlis, MD, Honolulu, HI  
Hai Le, MD, Houston, TX  
Hung Le, MD, Yorba Linday, CA  
Khoi Le, M.D., Rancho Cucamonga, CA  
Martha Anne Lederer, M.D., Houston, TX  
Connie Lee, M.D., San Francisco, CA  
Ellen Eun-Ok Lee, M.D., San Diego, CA  
Eric Jaewon Lee, M.D., Los Angeles, CA  
Jung In Lee, M.D., Edina, MN  
Katherine Elizabeth Lee, M.D., Cincinnati, OH  
Kevin Lee, M.D., Springville, UT  
Norman Young Lee, M.D., New York, NY  
Stephanie Lei, M.D., Irvine, CA  
Rachel Idel Leidner, M.D., Dallas, TX  
Elizabeth Leimbach, M.D., New York, NY  
Dusan Lekic, M.D., Port Saint Lucie, FL  
Ruby Lekwauwa, M.D., New Haven, CT  
Marc Lener, M.D., Bethesda, MD  
Iga Marianna Lentowicz, M.D., Birmingham, AL  
Lubov Leontieva, M.D., Liverpool, NY  
Brian Craig Lerner, M.D., Owings Mills, MD  
Amy Leung, M.D., Hayward, CA  
Howard Carl Levin, M.D., Glen Oaks, NY

Jacqueline Levin, M.D., Roslyn, NY

Richard Joseph LeVitre, M.D., San Antonio, TX

Jess D Levy, M.D., Cleveland, OH

Yingjian Liang, M.B.B.S., San Diego, CA

Ryan Marc Lieberman, M.D., Katonah, NY

Katherine Valerie Liebesny, MD, Providence, RI

Cliff Lin, M.D., Dunwoody, GA

Samuel Lin, M.D., Kentwood, MI

Francisco Jose Linares Alvarenga, MD, New York, NY

Patricia Lindahl, M.D., New York, NY

John Dax Lindo, M.D., Chicago, IL

Robin Lines, M.D., SLC, UT

Richard Linsk, M.D., Southfield, MI

Janet Lynn Linton, M.D., Fairhope, AL

Meegan Michelle Lipman, M.D., Denver, CO

Anson Liu, M.D., Baltimore, MD

Daniella Ann Loh, M.D., New York, NY

Akshay Lohitsa, MD, New York, NY

Maricarmen Lopez Maldonado, M.D., San Juan, PR

Rafael Lopez Sanchez, MD, New York, NY

Maria Cristina Lopez-Rosario, M.D., Dallas, TX

Karim Galal Lotfy-Mohammed, M.B.Ch.B., Chico, CA

Matthew Ryan Jen-Teh Louie, M.D., Arcadia, CA

Michael Louie, D.O., Arcadia, CA

Benjamin Lowenburg, M.D., New Orleans, LA

Lukasz Lozanski, M.D., Powell, OH

Sara Lozyniak, M.D., Somerville, MA

Weixin Lu, M.D., Oklahoma City, OK

David Lubinsky, D.O., Philadelphia, PA

Maykel Luna Concepcion, MD, Clearwater, FL

Delia Lupsa, M.D., Irvine, CA

Krista L. Lussier, M.D., Wrentham, MA

Starla Nicole Lyles, D.O., Twentynine Palms, CA

Ci Ma, M.D., San Diego, CA

Mona Mohamed Ali Maaty, M.D., Greenville, SC

Catherine Wickes MacColl, M.D., Vail, CO

Julio Cesar Machado Jr., M.D., Coral Gables, FL

Eric MacMaster, M.D., Syracuse, NY

Rohit Madan, M.B.B.S., Houston, TX

John Maurice Mahan, M.D., Salt Lake City, UT

Richa Maheshwari, M.D., Springfield, VA

Shipra Maheshwari, M.D., phoenix, AZ

Cameron Mahle, M.D., New York, NY

Pradipta Majumder, M.D., Philadelphia, PA

Narpinder Kaur Malhi, M.B.B.S., king of prussia, PA

Vikram Malhotra, M.B.B.S., Dublin, CA

Kashif Nadeem Malik, M.D., Newark, DE

George S Manatt, M.D., Saint Louis, MO

Andrea Parisa Mann, D.O., Palo Alto, CA

Lucian Miron Manu, M.D., Roslyn Heights, NY

Jia Mao, M.D., Pasadena, CA

Leslie Marino, M.D., New York, NY

Natalia Markova, D.O., White Plains, NY

Dana Marlowe, M.D., Madison, WI

Allison Stokan Marshall, M.D., Houston, TX

Nancy Martin, M.D., Atlanta, GA

David Morgan Martorano, MD, Casper, WY

Yury Mashkovich, D.O., Lexington, MA

Daniel Philippe Mason, M.D., Palo Alto, CA

Sylvia Schneider Maston, M.D., Merion Station, PA

Teofilo Enrique Matos Santana, M.D., New Haven, CT

Takashi Matsuki, M.D., Tenafly, NJ

Gina Matteson, M.D., Advance, NC

Tiffany N. Mattingly, M.D., Fort Smith, AR

Mikel Matto, M.D., San Francisco, CA

Dhizarah Lorraine Matus de la Parra Pellot, M.D., Doral, FL

Michelle Samson Maust, M.D., Woodbridge, VA

Laura Maxwell, M.D., Durham, NC

Elina Maymind, M.D., Cherry Hill, NJ

Anthony A Mazarulli, MD, Charlotte, NC

Kelsey Leigh McClellan, M.D., Little Rock, AR

Caroline Amanda McDonald, DO, Louisville, KY

Cheryl G. McGibbon, M.D., Pelham, NY

Jacob M McGrath, M.D., Doylestown, PA

Mirjana Grba McGrosky, M.D., Pittsburgh, PA

Colleen McGuire, M.D., Chicago, IL

Ellika McGuire, M.D., Seattle, WA

Jessica Marie McIlrath, D.O., West Des Moines, IA

Shane Patrick McKay, M.D., Austin, TX

Polawyn Claire McKinney, MD, Austin, TX

Shean McKnight, M.D., ANDOVER, KS

Jenea Nicole McNeal, M.D., Chicago, IL

Brian Patrick McPhee, M.D., West Hollywood, CA

Jennifer Marie McQuade, M.D., San Francisco, CA

Edgar Samuel Medina, M.D., SAN ANTONIO, TX

Amy Caren Mednick, MD, New York, NY

Suzanne Mary Meehan, M.D., Clive, IA

Steven J Meek, M.D., Sioux Falls, SD

Amita Mehta, M.D., Wexford, PA

Anuja Shah Mehta, M.D., Brookline, MA

Uri Meller, M.D., New York, NY

Tanya Menard, M.D., Brooklyn, NY

Marisa Mendel, M.D., Arlington, MA

Nathaniel Mendelsohn, M.D., New York City, NY

Constance Mennella, D.O., Providence, RI

Rowena Mercado, M.D., Richland, WA

Lawren Alycea Merideth, M.D., Norman, OK

Brian Merrill, M.D., Dayton, OH

Ryan Daniel Meshulam, M.D., Indianapolis, IN

Christopher John Mestrezat, M.D., Chicago, IL



Bruce Leonard Meyer, M.D., Minnetrista, MN  
Dmitry Meyerovich, M.D., Stamford, CT  
Asma Mian, M.D., Mahwah, NJ  
Katherine Michaelsen, M.D., Seattle, WA  
Isabella Michna, M.D., Middletown, CT  
Jamie L Migliori, M.D., Toledo, OH  
Justin J Miles, M.D., Minneapolis, MN  
Hun Millard, M.D., Woodbridge, CT  
Bradley Ress Miller, M.D., New York, NY  
Stacia Erin Mills, M.D., Pasadena, CA  
Jason Minion, M.D., South Bound Brook, NJ  
Veronica Miranda Lopez, M.D., San Juan, PR  
Garen Mirzaian, MD, Reno, NV  
Mitushi Mishra, M.D., Raleigh, NC  
Douglas Misquitta, M.D., Columbus, OH  
Andrew Gregory Mitton, MD, Los Angeles, CA  
Nikunj Kumar Trambaklal Modi, M.D., Florence, SC  
Othman Mahmoud Mohammad, M.D., Lynn, MA  
Sherin Moideen, M.D., Richmond, VA  
Gabor Molnar, D.O., St. Petersburg, FL  
Bryan C Moloney, M.D., Toledo, OH  
Varun Monga, M.B.B.S., Glendale, AZ  
Pamela Carolina Montano, M.D., New York, NY  
Brandon Gordon Moore, M.D., Rochester, NY  
Jeremy Clint Moore, D.O., Mobile, AL

Milana Mor, M.D., New York City, NY

Cynthia La Morgese Moran, M.D., Madison, WI

Leah Kim Morey, MD, Brighton, MA

Anastasia Morgan, M.D., Allen, TX

Robert Joseph Morgan, M.D., Rochester, MN

Alainia Morgan-James, M.D., Columbia, MD

Ryan Moroze, M.D., Aurora, CO

Nicole Monireh Morrison, M.D., Rancho Cucamonga, CA

Larry Khashayar Mortazavi, MD, New Haven, CT

Andrew G Mortimer, D.O., Anacortes, WA

Darcy Moschenross, M.D., Pittsburgh, PA

Amy Leigh Motamed, D.O., Dallas, TX

Rebecca Muhle, M.D., Douglaston, NY

Owen Muir, M.D., New York, NY

Jean Mulcare, M.D., Brooklyn, NY

Benjamin Murry Mulloy, M.D., Kansas City, KS

Sean Munnely, M.D., Honolulu, HI

Andrea Nichelle Murray, M.D., King of Prussia, PA

Hanan Mursi, M.B.Ch.B., Albany, NY

Juliet Muzere, D.O., Elverson, PA

Brendon Nacewicz, M.D., Madison, WI

Yedishtra Naidoo, MD, Rochester, NY

Hari Nair, M.D., Sunnyvale, CA

Parvathy Nair, M.B.B.S., Baltimore, MD

Rebecca Angela Najera, D.O., Los Angeles, CA

Firas Abdussalam Nakshabandi, M.D., Chicago, IL  
Kishan Nallapula, M.B.B.S., Birmingham, AL  
Chiranjir Narine, M.D., Scottsdale, AZ  
Abigail Nash, M.D., Bethesda, MD  
Karlin Nazario, M.D., Jamaica Plain, MA  
Niclaire L Neely, M.D., Macon, GA  
Marina Michaelovna Nell, M.D., San Antonio, TX  
Brent G Nelson, M.D., Minneapolis, MN  
Diane Lynn Nelson, M.D., Bismarck, ND  
Kierre Nelson, M.D., Madison, WI  
Liliya Nemirovskiy, MD, Mission, TX  
Paul Sasha Nestadt, M.D., Baltimore, MD  
Jaclyn Waddey Newman, M.D., Clearwater, FL  
Jamie Zhi-Min Ng, M.D., Sacramento, CA  
Jerry Ngo, M.D., Elk Grove, CA  
Lily Ngotran, M.D., Los Angeles, CA  
Elizabeth Thy Nguyen, M.D., Pearland, TX  
Giao Chau Nguyen, M.D., Garden Grove, CA  
James Nguyen, M.D., APO, AP  
Lynn Kim Nguyen, M.D., NY, NY  
Minh Cao Nguyen, MD, Monterey Park, CA  
Thu-Ha Nguyen, M.D., New York, NY  
Thuong-Phuong Van Nguyen, M.D., westminster, CA  
Thuy-Trang Nguyen, M.D., Springfield, MO  
William Nguyen, M.D., Bronx, NY

Krystal Leigh Nicht, M.D., Miami, FL

Barbara Spagiare Nightingale, M.D., Pittsburgh, PA

Mladen Nisavic, M.D., Boston, MA

Syed Sarosh Nizami, M.D., Edmond, OK

Geoffroy Ira Noonan, D.O., Portland, ME

Kathryn Reynolds Norfleet, M.D., Seattle, WA

Kristine Norris, D.O., Tucson, AZ

Lindsay Norton, M.D., Columbia, TN

Laura J Novak, M.D., Cherry Hill, NJ

Ross Eugene Nunes, M.D., Henryville, IN

Ndidiamaka Onyeawuli Nwaka, MD, Salisbury, MD

Vincent Nwabufo Nwankwo, M.B.B.S., Columbia, MO

Sylvester Nwedo, M.B.B.S., Bridgeport, CT

Brian Nyberg, M.D., Saint George, UT

Lauren Bridget O'Connor, M.D., Homewood, AL

Erin Elizabeth O'Flaherty, M.D., Denver, CO

Andrew Henry O'Hagan, M.D., Bronx, NY

Sarita Martene O'Neal, M.D., Winterville, NC

Thomas Oden, M.D., New Orleans, LA

William Oetgen, M.D., Charlottesville, VA

Chinyere I Ogbonna, M.D., Santa Clara, CA

Hande Okan, M.D., New York, NY

Jonathan Olivas, M.D., Fargo, ND

Peter Oliver, MD, Durham, NC

Nathan Ontrop, M.D., Chicago, IL

Ndidi Onyejiaka, M.D., Glencoe, IL

Ewere Onyero Osian-Dugan, M.D., Baltimore, MD

Louis Samuel Ostrowsky, M.D., Cambridge, MA

Evan Ouyang, M.D., Iowa City, IA

Gloria Funmilayo Oyeniya, M.D., Austin, TX

Krystal Ozanick, M.D., San Diego, CA

Ranjit Kumar Padhy, M.D., Bakersfield, CA

Kristen Leigh Pagel, M.D., Centerville, UT

Robert Timothy Paine, DO, Baltimore, MD

Nitika Pant, M.D., Brookfield, IL

Nicole Kristine Pardo, M.D., Sacramento, CA

Greta Naylor Park, M.D., Southfield, MI

Naomi Park, MD, Tucson, AZ

Sangil Park, M.D., Fredericksburg, VA

Taryn Mayumi Park, M.D., Mililani, HI

Rashmi Prabhudas Parmar, M.D., Rego Park, NY

Varinderjit Singh Parmar, MD, Whitby, ON

Matthew G Parra, MD, Reno, NV

Bruce N. Parsa, D.O., Overland Park, KS

Alireza Parsoei, M.D., Saint Louis, MO

David Partin, M.D., Corbin, KY

Kathleen Mary Patchan, M.D., Baltimore, MD

Kunal Anilbhai Patel, M.B.B.S., Greenwood, SC

Laxeshkumar B Patel, M.B.B.S., Carmel, IN

Milan R. Patel, M.D., Warm Springs, MT

Nirali Patel, M.D., Philadelphia, PA

Pragneshkumar P Patel, MD, Tampa, FL

Ravi Patel, M.B.B.S., Springfield, IL

Smitta Patel, M.D., Los Angeles, CA

Tejas C Patel, M.B.B.S., Brooklyn, NY

Charlene Patenaude, M.D., Amherst, MA

Aum Amar Pathare, M.B.B.S., New Haven, CT

Jill A. Patton, M.D., Albany, NY

Rohit Pawar, M.B.B.S., Ballwin, MO

Tiffany Ann Pendleton, D.O., Albuquerque, NM

Robert Jon Pensack, M.D., Denver, CO

Lori Peppers, M.D., Syracuse, NY

Lionel Elias Pereira, M.B.B.S., Brooklyn, NY

Matthew Thomas Perry, M.D., Festus, MO

Jawad Pervez, D.O., Glendale Heights, IL

Brittany Ray Peters, M.D., Nashville, TN

Matthew Eugene Peters, M.D., Baltimore, MD

Geoffrey Alan Peterson, M.D., Denver, CO

Sandra Peynado, M.D., Sioux Falls, SD

Juee Sharad Phalak, M.B.B.S., Saint Louis, MO

Vijay Amarnauth Phalgoo, M.D., Manorville, NY

Curtis Phillips, M.D., New York, NY

William Pierson, M.D., Bellevue, WA

Petra Pilgrim, M.D., Sugar Land, TX

Jessica Ann Pineda, M.D., Cincinnati, RI

Omar Farookh Pinjari, MD, Sugar Land, TX

Anna Alexandra Piotrowski, M.D., Fair Oaks, CA

Megan Pirigyi, M.D., Chicago, IL

Matthew D Pitcher, D.O., Folsom, CA

Melanie Johnson Pointer, M.D., Smyrna, GA

Samuel Andrew Polek, M.D., Leeds, AL

Sara Jean Polley, M.D., Minnetonka, MN

Caridad Ponce Martinez, M.D., New Haven, CT

Stephanie Pope, MD, Mentor on the Lake, OH

Emily Lizabeth Porch, M.D., Santa Rosa, CA

Graziella Portalatin-Chavez, MD, Brooklyn, NY

Celia Posada, M.D., Tulsa, OK

Marina Post, M.D., Stanford, CA

Roger George Pottanat, M.B.B.S., Boston, MA

Benjamin D Potter, M.D., Charleston, SC

Laura Lynn Potts, M.D., Boiling Springs, PA

Sean Carlisle Prabhu, M.D., Alexandria, VA

Sonal Patel Prasad, M.D., Fort Worth, TX

Stephanie L Price, D.O., Charleston, SC

Nausika Prifti, DO, Farmington, NM

Jennifer Clare Prins, M.D., Pittsburgh, PA

Vasthie Prudent, M.D., Miami, FL

Shipra Putatunda, M.D., Murfreesboro, TN

Roomana Qayyum, M.D., Bronx, NY

Syed Quadri, M.B.B.S., Marshall, MI

Kimberly Anne Quigley, M.D., Knoxville, TN

Sandra Quinn, M.D., Maplewood, MN

Sana Saeed Qureshi, M.D., Miami, FL

Emily Rose Rademacher, D.O., Green Bay, WI

Shelah Beth Radke, M.D., Reston, VA

Monila Rahimi, D.O., Carmichael, CA

Nathan D Rahm, M.D., Thornton, CO

Joseph Nicola Raiche, MD, Calgary, AB

Mary Chandler Rainey, M.D., New York, NY

Abita Raj, MD, Northborough, MA

Kristin Sharmila Raj, M.D., Palo Alto, CA

Leena Rajagopal, M.B.B.S., Jersey City, NJ

Champakamala Honganur Rajanna, MD, Glastonbury, CT

Arjune Rama, M.D., Madison, WI

Anupama Ramalingam, M.B.B.S., Columbia, MO

Dhakshin Ramanathan, MD, San Francisco, CA

Lalita Devi Ramnaraine, M.D., Newberry, FL

Nicholas Lawrence Ranallo, M.D., Joplin, MO

Noshene Ranjbar, M.D., Tucson, AZ

Todd Spencer Rankin, M.D., Arlington, VA

Suchet Rao, M.B.B.S., New York, NY

Farahnaz Raqib, M.D., Portland, OR

Zulfikar Ali Rasool Vali, M.D., Dublin, CA

Swapnil Rajan Rath, M.B.B.S., West Bloomfield, MI

Satpal Singh Rathour, M.D., Shirley, NY



Dave P Ravi, M.D., Honolulu, HI

Kevin Ray, M.D., Glen Oaks, NY

Anetta Raysin, D.O., Rockaway Beach, NY

Mahdi Razafsha, M.D., Gainesville, FL

Deborah Ann Redd, M.D., Fishers, IN

Tam Nguyen Redd, M.D., Garland, TX

Adarsh Surya Reddy, M.B.B.S., West Orange, NJ

Michael James Redinger, M.D., Kalamazoo, MI

Kandace Reece, M.D., Yonkers, NY

TK Reese, M.D., Fredericksburg, VA

Michelle Reeves, M.D., Birmingham, AL

Kelly Anne Register-Brown, M.D., Gaithersburg, MD

Manoj Regmi, M.B.B.S., Lovettsville, VA

Racquel Reid, M.D., San Antonio, TX

Diane Crowley Reis, M.D., West Lafayette, IN

Foster Renwick, D.O., Minneapolis, MN

Neelambika Sharanabasappa Revadigar, M.B.B.S., Bronxville, NY

Maria Margarita Reyes, M.D., Rochester, MN

John Stephen Rich, M.D., Nashville, TN

Meghan C Riddle, M.D., Nashville, TN

Tracie Rivera, M.D., Eureka, CA

Wilhem Rivera, M.D., Camden, NJ

Muhammad Rizvi, M.D., Helotes, TX

Melanie E Roberson, M.D., Pensacola, FL

John Edmund Roberts III, M.D., New Orleans, LA

Matthew Robin, D.O., Chicago, IL

Jennifer Rose Robinson, M.D., Detroit, MI

Brittany Rodgers, M.D., Pittsboro, NC

Peggy D Rodriguez, MD, Albuquerque, NM

Romualdo Ron Rodriguez, M.D., Chula Vista, CA

Vithya Rodriguez, M.D., Norwood, MA

Daniel Rodriguez Aponte, M.D., Hormigueros, PR

Michael Stephen Rogers, M.D., El Cerrito, CA

Jessica Florence Rollin, M.D., Zuni, NM

Juan Roman, M.D., Elk Grove, CA

Amanda Roper, M.D., Charleston, SC

Jessica Eve Rosales, M.D., San Antonio, TX

Kayla Rosen, M.D., Goleta, CA

Leah Ellen Rosenkrantz, D.O., Mount Laurel, NJ

David Byasa Ross, M.D., Mannford, OK

Sarah Rossetter, M.D., Tipp City, OH

Maxwell Rabson Rovner, MD, Chicago, IL

Courtney Rowling, M.D., Orchard Lake, MI

Qingmin Ruan, M.D., Katy, TX

Eric Soucy Rueff, D.O., Cincinnati, OH

Myuna Ruiz, M.D., Miami, FL

Ilianette Ruiz-Acevedo, M.D., Aguada, PR

Matthew L Runyan, M.D., Fort Wayne, IN

Loucresie Rupert, M.D., Hoover, AL

Jon Jared Rusciano, M.D., Bellaire, TX

Douglas Russell, M.D., Los Angeles, CA

Kashmira Rustomji, M.D., New Haven, CT

Hanna Yacoub Saad, M.D., Farmington Hills, MI

Deana Marie Sabol, D.O., Philadelphia, PA

Briana Dore Sacco, M.D., Plano, TX

Urooj Saeed, M.D., Katy, TX

Zaid Saeed, D.O., New Brunswick, NJ

Azita Safai, M.D., Belton, TX

Aamir Safdar, M.D., Lombard, IL

Myra Saha, D.O., Newington, CT

Rubby Saini, M.D., Greenville, NC

Ferda Sakman, M.D., New York, NY

Mark Victor Sakran, M.D., Fairfax Station, VA

Annaheta Salajegheh, M.D., New York, NY

Jennifer Beth Salisbury, DO, Veazie, ME

Thomas Gray Salter, M.D., Rochester, MN

Stanley Samuel, M.D., Brooklyn, NY

Luna T Sanchez Rivera, M.D., Guaynabo, PR

Cristina Ivette Sanchez Torres, M.D., Farmington, CT

Miguel Alexander Sanchez-Almira, MD, New York, NY

Steven Sand, M.D., Winston Salem, NC

Andrew Sander, M.D., Metairie, LA

Kimberly Sanders, M.D., Charlottesville, VA

Joshua Sanderson, M.D., New Orleans, LA

Jessica Flores Sandoval, M.D., San Antonio, TX

Smink Sangsura, M.D., Shreveport, LA  
Dino Santoro, MD, Plattsburgh, NY  
Douglas Saphier, M.D., Englewood, NJ  
Shama Saqi, M.D., East Elmhurst, NY  
Ratko John Sarazin, M.D., Milton, FL  
Sapna Sareen, M.D., Chicago, IL  
Deepak Sarpal, M.D., Glen Oaks, NY  
John Saunders, M.D., Houston, TX  
Sarah Ingrid Savage, M.D., Lebanon, NH  
Aaron Savedoff, M.D., New York, NY  
Abhinav Saxena, M.D., Snellville, GA  
Meha Saxena, M.D., Pasadena, CA  
Amirali Sayadipour, M.D., Elkridge, MD  
Audra Christian Searce, D.O., Norman, OK  
Max Leib Schiff, M.D., Nashville, TN  
Eric Hall Schindler, M.D., Lebanon, NH  
Robert Johannes Schloesser, M.D., Pasadena, MD  
Brian Schultz, M.D., Honolulu, HI  
Joseph John Schumacher, M.D., Portland, OR  
Paul Edrick Schutt, M.D., San Mateo, CA  
Pernilla Schweitzer, M.D., Woodside, CA  
Wesley Neal Seabolt, M.D., Blairsville, GA  
Olusola Segun, M.B.B.S., Staten Island, NY  
David Robert Seigler, M.D., Riverside, CA  
Anuradha Sekhri, M.D., Roanoke, VA

Mehrzad Seraji, M.D., Ballwin, MO  
Ariel Seroussi, M.D., Los Angeles, CA  
Raymond Serrano, M.D., Natick, MA  
Michael Seyffert, M.D., Ann Arbor, MI  
Mervat J. Sha'ini, M.B.B.S., Orland Park, IL  
Heather Shacket, M.D., San Diego, CA  
Shervin Shadianloo, M.D., New York, NY  
Ajay Akshay Shah, M.D., Houston, TX  
Bushra Shah, M.D., Henrico, VA  
Chintan Shah, M.D., Pittsburgh, PA  
Jyoti Shah, DO, Indianapolis, IN  
Neha Narendra Shah, DO, Powell, OH  
Panna R. Shah, M.D., Encinitas, CA  
Reena Shah, M.D., Kansas City, KS  
Samreen Shah, M.B.B.S., Bloomfield Hills, MI  
Aliaksandr Vladimirovich Shakhau, M.D., Concord, NH  
Ruby Shandilya, M.D., San Francisco, CA  
Terry Xiaozhou Shang, M.D., Mullica Hill, NJ  
Anna Shapiro, M.D., New York, NY  
Desiree Shapiro, M.D., San Diego, CA  
Nima Sharif, M.D., Pomona, CA  
Amal Sharifi, M.D., Glendale, AZ  
Aditi Sharma, M.D., Seattle, WA  
Anup Sharma, M.D., Philadelphia, PA  
Mehak Sharma, M.D., New York, NY

Varun Sharma, M.B.B.S., Bryn Mawr, PA  
Vitaliy Shaulov, MD, Laguna Niguel, CA  
George Michael Shehi Jr, M.D., Mobile, AL  
Heather Marie Shelton, MD, Plainfield, IN  
Mohamed Sherif, M.B., B.Ch., Providence, RI  
Neeral Kamlesh Sheth, D.O., Chicago, IL  
Shalini Shetty, M.D., Glen Oaks, NY  
Holly Shiao, M.D., Austin, TX  
Angela D Shields, M.D., Nashville, TN  
Jack Shier, M.D., Scottsdale, AZ  
Daphna Shiffeldrim, M.D., Ney York, NY  
Catherine Eunyung Shim, M.D., Auburn, WA  
Frances Sugene Shin, M.D., New York, NY  
Lara Goenjian Shirikjian, D.O., Torrance, CA  
Rachel Shmuts, D.O., Cherry Hill, NJ  
Oladayo Davidson Shobola, M.D., Windsor, ON  
Aaron Short, M.D., Houston, TX  
Mohammed Ali Shreiba, M.D., Santa Cruz, CA  
Michelle Kristina Shuff, M.D., Los Angeles, CA  
Walter James Shuham, M.D., Chicago, IL  
Nabil Siddiqi, M.D., Haverstraw, NY  
Farhan A. Siddiqui, M.D., PISCATAWAY, NJ  
Emily Lee Siege, M.D., Cumberland, ME  
Andrew Michael Siegel, M.D., Philadelphia, PA  
Kristi Ann Sikes, M.D., The Woodlands, TX

Melissa Ann Silverman, M.D., San Mateo, CA  
Fernando Bienvenido Silvestre, M.D., Paterson, NJ  
Norleen Simangan, M.D., Seattle, WA  
Fatma Simsek-Duran, M.D., Iowa City, IA  
Divya Jot Singh, M.D., Phoenix, AZ  
Garima Singh, M.B.B.S., Columbia, MO  
Harvinder Singh, MD, Lansdale, PA  
Shirshendu Sinha, M.B.B.S., Rochester, MN  
Kimberley Siscoe, M.D., Louisville, KY  
Regana Contini Sisson, MD, Portland, ME  
Mauran Sivananthan, D.O., Ann Arbor, MI  
Danica Rose Skibola, M.D., Oakland, CA  
Veronica Sloatsky, M.D., Washington, DC  
Christian Robert Small, MD, Encinitas, CA  
Jonathan David Small, M.D., Philadelphia, PA  
Jennifer Sierra Smith, M.D., Auburn, AL  
Paula Marie Smith, M.D., Hamden, CT  
Rebekah Marie Smith, M.D., Albuquerque, NM  
Erica Elizabeth Smolcic, M.D., Philadelphia, PA  
Caitlin Snow, M.D., New York, NY  
Monica Soliman, M.D., Los Alamitos, CA  
Claire Mikhaila C Sollars, MD, Mesa, AZ  
Laurie Ann Solomon, MD, Gainesville, FL  
Samira Solomon, M.D., West Hartford, CT  
Matthias Sommer, MD, Bala Cynwyd, PA

Cindy Sondag, M.D., Fargo, ND

Nichole Sonderman, M.D., Louisville, KY

Madhav Vijaykumar Soni, MBBS, Jasper, AL

Endra Sookoor, D.O., Apollo Beach, FL

Anothai Soonsawat, M.D., Los Angeles, CA

Giulia Sorrentino, M.D., Hamden, CT

Anthony Dale Sossong, M.D., Boston, MA

Shirley Sostre-Oquendo, MD, Hackensack, NJ

Gillian Louise Sowden, M.D., Lebanon, NH

Alma Spaniard, M.D., Tuckahoe, NY

Traci Jenelle Speed, M.D., Baltimore, MD

Margaret Spottswood, M.D., Cambridge, MA

Veraanong Srakhao, M.D., Bronx, NY

Rekha Srinivasan, M.D., Egg Harbor City, NJ

Michael Stachniak, D.O., Montgomery Village, MD

Jessica Lauren Stahl, M.D., Tucson, AZ

Jeffrey Stearns, M.D., Ann Arbor, MI

Kara Lynn Stebbins, M.D., Lexington, KY

Christian Schumacher Steiner, M.D., Findlay, OH

Joshua Stephens, M.D., Mobile, AL

Jessica Stern, M.D., Cambridge, MA

Amy Stevens, M.D., Branford, CT

Jaime Stevens, M.D., Baltimore, MD

Jeremy Royle Stoddart, M.D., Boise, ID

Alexander English Storch, M.D., New York, NY



Bentley Strockbine, M.D., Baldwinsville, NY

Staffel Strong, M.D., Atlanta, GA

Christopher Michael Struble, M.D., Redondo Beach, CA

Jagannath Subedi, M.D., Winston Salem, NC

Thomas Alexander Suberman, M.D., Los Angeles, CA

Adiza Jumaih Sulley, MD, Chandler, AZ

Ryan Sultan, M.D., NY, NY

Ye-Ming Jimmy Sun, M.D., North Brunswick, NJ

Amarjot Singh Surdhar, M.B.B.S., Bellerose, NY

Sandarsh Surya, M.B.B.S., Pittsburgh, PA

Steven Sust, M.D., Palo Alto, CA

Yevgeniy Suvorov, M.D., Mercer, PA

Erich Swafford, MD, Dallas, TX

Fahd Ahmed Syed, M.D., Rochester Hills, MI

Saba Syed, MD, Chicago, IL

Katalin Anna Szabo, M.D., Belmont, CA

Reza Tadayon-Nejad, M.D., Ph.D., Chicago, IL

Nauman Hanif Taj, M.B.B.S., North Platte, NE

Christopher Robert Takala, D.O., Rochester, MN

Ashish Tambar, M.D., Williamsville, NY

Nicholas Tamoria, M.D., Silver Spring, MD

Gen Tanaka, MD, Oak Park, IL

Pooja Tandon, M.D., Huntington Station, NY

Michael Ming Hui Tang, D.O., M.P.H., Lebanon, NH

Yilang Tang, M.D., Tucker, GA

Clint Steven Tanner, M.D., Centennial, CO  
Nilesh Suresh Tannu, MD, Pearland, TX  
Susan Tansil, M.D., Brooklyn, NY  
Suzanne R Tariot Sheard, M.D., Tempe, AZ  
Rokeya Tasnin, M.D., Waynesville, OH  
Joseph Tasosa, M.D., Pittsburgh, PA  
Carl Taswell, MD, Ladera Ranch, CA  
David Arthur Tatum, D.O., Rochester, NY  
Mandrill Taylor, M.D., New Haven, CT  
Rebecca Taylor, M.D., Chapel Hill, NC  
John Michael Teal, M.D., Cambridge, MA  
Samuel Mulugeta Temesgen, M.D., Columbia, MO  
Drew Tepper, M.D., Madison, NJ  
Garth Terry, M.D., Seattle, WA  
Susrutha Thanam, M.D., Wichita Falls, TX  
Ketty Pierre Thertus, M.D., Roselle, NJ  
Jonathan Stuart Thiele, M.D., Aurora, CO  
Joshua Thomas, M.D., Houston, TX  
Sheila A. Thomas, MD, Litchfield, IL  
Alyssa Lynn Thompson, M.D., Wilmington, NC  
Harold Thompson, M.D., Brentwood, TN  
Kirsten Thompson, M.D., Los Angeles, CA  
Nancy Ellen Tice, D.O., Merrick, NY  
Elizabeth Marie Tiffany, M.D., Cincinnati, OH  
Gagan Tindoni, MD, NEWBURGH, IN

Mark Bryan Ting, M.D., Clovis, CA

Victor Tirado-Montanez, M.D., Avon, CT

Annya Dorothy Tisher, M.D., New Haven, CT

Emily Todd, M.D., Los Angeles, CA

Kirsten Tollefson, M.D., Bloomsburg, PA

Silvina Beatriz TonarellideMaud, MD, El Paso, TX

Alyssa Torby, M.D., Portland, OR

Caroline Patricia Toro Ruiz, M.D., Mayaguez, PR

Olli Toukolehto, MD, Silver Spring, MD

Jennifer Treusch, M.D., Tucson, AZ

Alison Trexler, M.D., Carlsbad, CA

Samidha Tripathi, M.B.B.S., Philadelphia, PA

Laura Dyann Tully, M.D., San Francisco, CA

Eric Yuanker Tung, D.O., San Diego, CA

Andrew Gabriel Turner, M.D., Lawton, OK

Lida Celeste Turner, M.D., Kirkland, WA

Akihito Uezato, M.D., Tokyo, n/a

Aghaegbulam Harachi Uga, M.B.B.S., El Paso, TX

Karina Umanskaya, D.O., Charlestown, MA

Allison Kay Ungar, M.D., Bronx, NY

Lauren Nicole Uslinov, M.D., Amherst, NY

Michael Hale Vagts, M.D., Campbell, CA

Vinay Vajjhala, M.D., Pittsburgh, PA

Rebecca Van Horn, M.D., Beverly Hills, CA

Marshall Paul Vance, MD, Eugene, OR

Kalya Vardi, M.D., San Diego, CA  
Deepti Vats, M.B.B.S., Atlanta, GA  
Mohsen Vazirian, M.D., Rocky River, OH  
Linessa Maria Vega, M.D., Colleyville, TX  
Divya Vemuri, M.D., Novi, MI  
Philip Emanuel Vincent, M.D., Millstone, NJ  
Derek Gavin Vines, MD, Bozeman, MT  
Joseph Nicolas Voigt, M.D., Dix Hills, NY  
Kelley Alma Volpe, M.D., Chicago, IL  
Christoph Valentin von Andreae, M.D., Wynnewood, PA  
Hailong Dinh Vu, M.D., Stanton, CA  
Erika Elise Wahl, M.D., Tucson, AZ  
Anureet Walia, M.B.B.S., Omaha, NE  
Kyle Christopher Walker, MD, New Haven, CT  
Natasha Wallace, M.D., Brooklyn, NY  
Scott Walmer, D.O., Milford, CT  
Alexandra Veronica Wang, M.D., Gainesville, FL  
Jia Wang, M.D., Houston, TX  
Samrah Waseem, M.D., Piscataway, NJ  
Akemi Watkins, MD, North Richland Hills, TX  
Douglas Ryan Weber, DO, Fayetteville, NC  
Samuel Weber, M.D., North Logan, UT  
Samuel A. Weisblatt, M.D., New York, NY  
Alison Welch, M.D., New York, NY  
Sean Weldon, D.O., Pittsburgh, PA

Allyson Kathryn Wells, M.D., Long Beach, CA  
Jennifer Catherine Wells, MD, Roanoke, VA  
Trevor Owen Wells, M.D., Long Beach, CA  
Diana Liza Wertz, M.D., San Mateo, CA  
Rachel Wheeler, MD, Saint George, UT  
Jessica Whipkey, M.D., Flemington, WV  
DeJuan Tarrell White, M.D., Atlanta, GA  
Megan White, M.D., Austin, TX  
Caleb Whitenack, M.D., Cedar Park, TX  
Gerry-Lynn Wichmann, M.D., Louisville, KY  
Laura Wieczorek, D.O., Baltimore, MD  
Patrick George Wiita, M.D., West Hollywood, CA  
Margarita A Wilkes, M.D., Mount Pleasant, SC  
David Matthew Willey, M.D., Leawood, KS  
Aisosioya Simmons Williams, M.D., Columbia, MD  
Amanda Jean Williams, M.D., Montgomery, AL  
Daniel Mark Williams, M.D., Bullard, TX  
Joshua Williams, M.D., Arlington, MA  
Samuel Leviticus Williams III, M.D., WEST FRIENDSHIP, MD  
Benjamin Brian Williamson, M.D., Surf City, NC  
Laura Willing, M.D., Durham, NC  
Amy Wilson, M.D., Salt Lake City, UT  
Brian Alan Wilson, D.O., Hot Springs, SD  
Johanna Wilson, MD, Ashland, OH  
Kimberlee Wilson, D.O., Tulsa, OK

Victoria Sophia Winkeller, M.D., Pittsburgh, PA

Christine Winter, D.O., Ogden, KS

Nicholas Wisnoski, MD, New York, NY

Alan Wittenberg, M.D., New York, NY

Catharine Grace Wolfe, M.D., Atlanta, GA

Bradford Alexander Wolfram, M.D., Marina Del Rey, CA

Alan Wolfson, M.D., Tucson, AZ

Rosemary Elizabeth Wright, D.O., Fort Worth, TX

William Wright, M.D., Charleston, SC

Michelle Wu, M.D., Los Angeles, CA

Aiying Xiao, M.B.B.S., Ballwin, MO

Laura E. Yahr Nelson, M.D., Pawtucket, RI

Philip Michael Yam, MD, Gretna, LA

Alan Charles Yancovitch, M.D., New York, NY

Amy Yang, M.D., Chicago, IL

Bryan Kim Yang, M.D., Los Angeles, CA

Esther Yang, M.D., Orange, CA

Brandon C. Yarns, M.D., New Haven, CT

Shinji Yasugi, M.D., Ann Arbor, MI

Brady Yates, D.O., Chevy Chase, MD

Ronaldo Yearwood, M.D., Rochester, NY

Emily Nicole Yee, M.D., Irvine, CA

Elmira Tulegenova Yessengaliyeva, M.D., Palo Alto, CA

Susan Yeung, M.D., New York, NY

Jenny Lee Yi, M.D., Ashburn, VA

Jun Yin, M.D., Roanoke, VA

Allison Yoder, M.D., Louisville, KY

Rachel Brooke Yoder, M.D., Washington, DC

Scott Yoho, D.O., Delaware, OH

Nina Yokochi Funkhouser, D.O., Pittsburgh, PA

Mina Youssef, M.D., Redondo beach, CA

Rana Zahiri, D.O., New York, NY

Colleen M. Zanis, D.O., Bloomsburg, PA

Adam Zavodnick, M.D., New Hyde Park, NY

Olga Zhalkovska, M.D., Hopkinton, NH

Mini Zhang, M.D., Portland, OR

Xiujun Zhao, M.D., Bethesda, MD

Federico Meinrado Zuniga Echavarria, M.D., New York, NY

Olivia S. Zurek, M.D., Providence, RI

Aleksandr Zverinskiy, M.D., Brooklyn, NY

## **Psychiatry Part II, May 29, 2015**

Kristen Kamille Abrams, M.D., Loma Linda, CA

Deborah Yvette Anderson, M.D., Kennesaw, GA

Julian Hernando Ariza, M.D., Miami, FL

Carolyn Sloan Burton, M.D., Frisco, CO

Perla Pacion Castillo-Caraos, M.D., Staten Island, NY

Faisal A Chaudhry, M.D., Stroudsburg, PA

Venkata Ravi Shankar Chivukula, M.D., Morgantown, WV

Keith David Conant, M.D., Portland, OR

Avery S. Grauer, M.D., Hamden, CT

Lourdes Grayson, M.D., Bakersfield, CA

Layth Kawther Hakim, M.D., Ojai, CA

Farrukh Husnain Hashmi, M.D., Richland, WA

Christopher James Holt, M.D., Silver Spring, MD

Kamrul Ahsan Khan, M.D., New Hartford, NY

Irina Kiblitky, M.D., Brooklyn, NY

James Joseph O'Reilly Magauran, M.D., Newton, MA

Fareen Malik, M.D., Scottsdale, AZ

Abdel-Fatah Massoud, M.D., Fairmont, WV

Shahnawaz Meer, M.D., Lakewood, NY

Niveditha Meghadri Moses, M.D., Fords, NJ

Marina Obolnikov, M.D., Redwood City, CA

Neha Barot Patel, M.D., Henderson, NV

Richelle Strauss Porapaiboon, M.D., Chicago, IL



Mahender Reddy Purmandla, M.D., Laguna Beach, CA

Sophia Rouzier, M.D., Port St Lucie, FL

Karelis Sierra-Cintron, M.D., Fort Washington, PA

Kim Bolan Simic, M.D., Valparaiso, IN

Jessica Margaret Stone, M.D., Bozeman, MT

Seth Louis Strauss, M.D., Mobile, AL

Muhammad Shafique Tahir, M.D., Brooklyn, NY

Rhodora Padilla Tolentino, M.D., Northridge, CA

Bartholomew Thomas Vereb, M.D., Bradenton, FL

## **Psychiatry Part II, September 25, 2015**

Emelina A. Arocha, M.D., Coral Gables, FL

Maria Benetos, D.O., Smithtown, NY

Jamil Masih Bhatti, M.D., Vineland, NJ

Vishnu P. Challapalli, M.D., Pittsford, NY

Quandelin Evelyn Dash, M.D., Hyattsville, MD

Freddy Cyriaque Desormeaux, M.D., Huntington, NY

Daniel Laurence Diaz, M.D., San Antonio, TX

Ashraf Elshafei, M.D., Paramus, NJ

Saira N. Haider, M.D., Scarsdale, NY

Syed H Jaffery, M.D., Ithaca, NY

Abas Mohamed Jama, M.D., Sandusky, OH

Steven Leslie Kaplan, M.D., Miami, FL

Lori Shizuko Murayama-Sung, M.D., Honolulu, HI

Lucyna Maria Puzkarska, M.D., Northbrook, IL

Carmen M. Rodriguez Mallia, M.D., Guaynabo, PR

Patricia Ann Shively, M.D., Norcross, GA

Don Oscar George Smith, M.D., farmingtonhills, MI

Nicholas Taintor, M.D., Arlington, VA

Taninder Kaur Tharani, M.D., San Jose, CA

Yura Kay Williams, M.D., Baltimore, MD

**Psychiatry MOC, February 9, 2015**

John Frederick Abess, M.D., Charleston, SC

Linus S. Abrams, M.D., Greenwich, CT

JuLita Rae Adamczak, M.D., Clintondale, NY

Jose Ignacio Adan, M.D., Belleair Beach, FL

Bhushan Shreeram Agharkar, M.D., Brookhaven, GA

Deepika Agrawal, M.D., Tacoma, WA

Yasir Ahmad, M.D., Old Tappan, NJ

Nadeem Ahmed, M.D., Sewickley, PA

Syed Erfan Ahmed, M.D., Brecksville, OH

Syed Zafar Ahsan, M.D., Williamsburg, VA

Christopher Bruns Aiken, M.D., Winston Salem, NC

Jerry Rhodes Ainsworth, M.D., Ph.D., Carmel, CA

Sam Ajluni, M.D., Beverly Hills, MI

Akinwande Akanji Akintola, M.D., PLANO, TX

Rayan Kamal Al Jurdi, M.D., Houston, TX

Shehla Alavi, M.D., Rosemount, MN

Robert Pasquale Albanese Jr., M.D., Houston, TX

Sarker Abdul Aleem, M.D., Starkville, MS

Osman Mohammed Ali, M.D., Plano, TX

Saleem Akber Ali, M.D., Columbus, MS

Shahid Ali, M.D., Brentwood, TN

Shahzad Saeed Allawala, M.D., Duncanville, TX

Janine Collins Allison, M.D., Tucson, AZ

Margarita M. Alonso, M.D., San Diego, CA  
Emad Alshami, M.D., West Chester, OH  
Mark David Alter, M.D., Ph.D., Ardmore, PA  
Jules Richard Altfas, M.D., Portland, OR  
Robin Aaron Altman, M.D., Wyomissing, PA  
Chandramouleswar Rao Amara, M.D., Richmond, VA  
Sumit Anand, M.D., Alexandria, VA  
David Christopher Anderholm, M.D., Baxter, MN  
Laura Lee Anders, M.D., Chicago, IL  
Brian Alexander Anderson, M.D., Broomfield, CO  
Robin Lesser Androphy, M.D., Clayton, MO  
Janet Laizer Angelo, M.D., Brandon, MS  
Augusto Pedro Angulo, M.D., Glen Head, NY  
Svetlana Anic, M.D., Atascadero, CA  
Clint Wayne Anthony, M.D., Prescott, AZ  
Juan Carlos Arguello, D.O., Sacramento, CA  
Casey Clark Arney, M.D., Nashville, TN  
Ali Onur Artar, M.D., Chicago, IL  
Kamal Haydari Artin, M.D., Irvine, CA  
Tom Richard Asfar, M.D., Flushing, NY  
Mohammad Ashfaq, M.D., Mays Landing, NJ  
James Claude Ashworth, M.D., Salt Lake City, UT  
Manuel Astruc, M.D., Saratoga Spgs, NY  
Lakshmi Athota, M.D., Lombard, IL  
Charles David Atkins, M.D., Woodbury, CT

Antoinette Marsha Azar, M.D., Claremont, CA  
Constantine Alba Azarcon, M.D., Wilmington, DE  
Amin Nabil Azzam, M.D., San Francisco, CA  
Asma Badar, M.D., Cherry Hill, NJ  
Stephanie Diane Bagby-Stone, M.D., Columbia, MO  
Julia Garza Bailey, M.D., San Antonio, TX  
Lisa Gaye Bailey, M.D., Ashland, OR  
Joseph Balla, M.D., Raleigh, NC  
Rosina Ibelkis Bandanza, M.D., Guilford, CT  
Michael John Baron, M.D., MPH, Franklin, TN  
Jera Anne Barrett, M.D., J.D., Silver Lake, OH  
Charles Dennis Barton Jr., M.D., Mountain View, CA  
James Scott Bartunek, M.D., Rochester Hills, MI  
Salman Baseer, M.D., Marietta, GA  
Kausar Hussain Bashir, M.D., The Woodlands, TX  
Cynthia Linda Baxter, M.D., Calgary, AB  
David Allen Beck, M.D., Columbia, MO  
Stuart Ellis Beck, M.D., Brookline, MA  
Anne Edith Becker, M.D., Ph.D., Newton, MA  
Thomas John Becker, M.D., Los Altos, CA  
Michael Paul Bednarz, M.D., Macomb, IL  
Farzana Begum, M.D., Cheshire, CT  
Lori Waranch Bekenstein, M.D., Glen Allen, VA  
Grant Bennett Belnap, M.D., Eagle, ID  
Corinne Judith Belsky, M.D., Evanston, IL

John Dieter Bennett, M.D., Carrollton, TX

Marty Neal Bennett, M.D., Frisco, TX

Christopher B. Benton, M.D., Coral Gables, FL

Brendan Joseph Beresford, M.D., Hinsdale, IL

Alexandra Berger, M.D., Congers, NY

Lorinda Jean Berger, D.O., Huntingdon Valley, PA

Douglas J. Berne, M.D., Wyomissing, PA

Gary Edward Beven, M.D., Friendswood, TX

Priti Bhardwaj, M.D., Los Angeles, CA

Prakash Krishin Bhatia, M.D., San Diego, CA

Sharad Hariprasad Bhatt, M.D., N Canton, OH

Theresa Sullivan Bishop, M.D., Greenwood, SC

Terri Elizabeth Blackwell, M.D., Charlotte, NC

Hilary Patricia Blumberg, M.D., Westport, CT

Samantha Boardman, M.D., New York, NY

Harold Louis Boerlin III, M.D., Laguna Niguel, CA

Michael Parks Bogenschutz, M.D., New York, NY

Debra Anderson Bolick, M.D., Hickory, NC

Margaret Ann Bolton, M.D., Vergennes, VT

Brian Patrick Raphael Bora, M.D., Wynnewood, PA

Jeffrey Bouchard-Burns, M.D., Astoria, NY

Lisa Dianne Boyd, M.D., Spring, TX

Clara Antoinette Bozievich, M.D., Corvallis, OR

Hetal Kanaiyalal Brahmbhatt, M.D., Johnson City, TN

Dasen Brajkovic, M.D., Harrington Park, NJ

Martin Julian Brandes, M.D., Baltimore, MD  
Preetinder Paul Singh Brar, M.D., Charlotte, NC  
Timothy Dean Breitholtz, M.D., Durham, NH  
Brian Patrick Brennan, M.D., Arlington, MA  
Grant Hilary Brenner, M.D., New York, NY  
Emily Deans Brideau, M.D., Norwood, MA  
William Gregory Briscoe, M.D., Yorktown, VA  
Hector Fabio Britto, M.D., Wellington, FL  
Tara Lynn Broadwater, M.D., Eagan, MN  
David Peter Bross, M.D., Great Neck, NY  
Kristin M. Brousseau, D.O., Boulder, CO  
Alycia Moore Brown, M.D., Linville, NC  
James Kenneth Brown, M.D., Durham, NC  
Kendall Paul Brown, M.D., Woodway, TX  
Suzanne Margarete Bruch, M.D., Woodside, CA  
Elena Bruck, M.D., New York, NY  
Peter Francis Buckley, M.D., Augusta, GA  
Ronald Brent Burbank Jr., D.O., Fpo, AE  
V. Renee Burdett, M.D., Woodbridge, VA  
Michael Joseph Burke, M.D., Ph.D., Wichita, KS  
Randall John Burke, M.D., Santa Ana, CA  
Bruce Elliott Burns, M.D., Davis, CA  
Mary Burns, M.D., Atlanta, GA  
Steven Donald Buser, M.D., Asheville, NC  
Tony Lee Byler, M.D., Mount Gretna, PA

Douglas William Byrd, M.D., Jackson, MS

Christopher Peter Camilleri, M.D., Monterey Park, CA

Rosemarie Elena Camoscio, M.D., Wellesley, MA

Nioaka Nicole Campbell, M.D., Lugoff, SC

Vivian Denise Campbell, M.D., Charlotte, NC

Elizabeth Wilma Canelas, M.D., Oak Park, IL

Mark Arnett Cannon, M.D., Overland Park, KS

Jose R. Capiro, M.D., Lewes, DE

Katherine Lenore Carlson, M.D., Salt Lake City, UT

Sharmila Gokhale Carlton, M.D., San Diego, CA

Penelope Margaret Carmichael, D.O., Bayside, NY

Donna J. Carmosky, M.D., Haymarket, VA

Patricia Ann Carneval, M.D., Princeton, NJ

Chris Adair Carson, M.D., Phoenix, AZ

Keith Allen Caruso, M.D., Brentwood, TN

Maria Christina Catalano, D.O., Tampa, FL

Eric Lee Caten, M.D., Sandy, UT

Edgar Meltiades Catingub, M.D., Elk Grove, CA

Marcellus Cephas, M.D., Silver Spring, MD

Jeffrey Steven Chalfant, D.O., Fairview Heights, IL

Laura Lynette Champagne, M.D., Shenandoah, TX

Ritu Chandak, M.D., Jersey City, NJ

Dilip Chandran, M.D., Morgantown, WV

Umopathy Channamalappa, M.D., Oakmont, PA

Anna Chapman, M.D., New York, NY



Eric C. Chapman, M.D., Eugene, OR

Anjan Chatterjee, M.D., New York, NY

Rauf Aman Cheema, M.D., Sterling, VA

Mary Thenamkodath Cherian, M.D., Downers Grove, IL

Bharathi Cheruvanky, M.D., Plainview, NY

Shanthi Chezian, M.D., Metuchen, NJ

Daniel Arun Chidpungtam, M.D., Cohasset, MA

Imran Chishti, M.D., Chesterfield, MO

Sapana Rashmi Chokshi, M.D., Lisle, IL

Yun Suk Chong, M.D., Orange, CA

Shahida Begum Chowdhury, M.D., Bethesda, MD

Yujuan Choy, M.D., Irvine, CA

David Eugene Ciancimino, M.D., Trumbull, CT

Indra Kumar Cidambi, M.D., Bound Brook, NJ

Rebecca Therese Cirino, D.O., Valley City, OH

Camellia Pratt Clark, M.D., San Diego, CA

Peta Jane Clarkson, M.D., Chadds Ford, PA

Cathleen Ann Cleary, M.D., Bonaire, GA

William Eric Clemons, M.D., Charlotte, NC

Nancy Louise Cloak, M.D., Portland, OR

Jeffrey Scott Cluver, M.D., Charleston, SC

Thomas Cobb, M.D., Sautee Nacoochee, GA

Bruce Jeffrey Cohen, M.D., Charlottesville, VA

Daniel Stuart Cohen, M.D., Tucson, AZ

Jason Leon Cohen, M.D., Marlboro, NJ

Paul A. Colaiaco, M.D., Sewickley, PA

Juan Rolando Colareta, M.D., Duluth, MN

Yasmin Marie Collazo, M.D., New York, NY

Elizabeth Kathleen Collumb, M.D., La Jolla, CA

Robert John Conciatori, M.D., Whitestone, NY

Amy Marie Connell, M.D., Stoughton, WI

Sandra Kay Connell, M.D., Seattle, WA

Stuart Allen Conrad, M.D., Harker Hts, TX

Eduardo Alfredo Constantino, M.D., East Setauket, NY

Christi Lee Cooper-Lehki, D.O., Morgantown, WV

Cheryl Mary Corcoran, M.D., Fort Lee, NJ

Deanna Guith Cornelius, M.D., Waxhaw, NC

Deborah Lynn Couch, M.D., Franklin Park, IL

Robyn Lyn Cowperthwaite, M.D., Edmond, OK

Tracey Wills Criss, M.D., Roanoke, VA

Jocelyn Aquino Cruz, M.D., Fairfield, CA

Yvette Marie Cruz, M.D., San Juan, PR

Evelyn Cumberbatch, M.D., Hamden, CT

Tiffany Cummins, M.D., Brooklyn, NY

Diane E. Custer, M.D., Lafayette Hill, PA

Barbara Marie D'Orio, M.D., Atlanta, GA

Carl Maclin Da Cunha, M.D., Bartlett, TN

Denize Da Silva-Siegel, M.D., New Paltz, NY

Jiri Danczik, M.D., Cheyenne, WY

Visala Dandamudi, M.D., Northville, MI

Rajendra Jacob Daniel, M.D., Rowlett, TX

Colin Yuri Daniels, M.D., Lakewood, WA

Jasmin Cornette Daniels, M.D., Durham, NC

Kettlie Joseph Daniels, M.D., Toledo, OH

Degan Joseph Dansereau, M.D., New Orleans, LA

Piali Mukherjee Das, M.D., New York, NY

Albana Maria Dassori, M.D., San Antonio, TX

Mohamed Raza Dattu, M.D., Gladwyne, PA

Daniella David, M.D., Pinecrest, FL

John Joseph Benjamin Davidman, M.D., Maplewood, NJ

John Mattison Davis, M.D., Williamsburg, VA

Angela Dawson, M.D., Albany, GA

Amado Abul Daylo Jr., M.D., Bellevue, WA

Ariel De Llanos, M.D., San Antonio, TX

Cynthia Marie De Vos, M.D., The Woodlands, TX

John Morrison Delaney, M.D., Carmel, IN

James Steven Demer, M.D., Baldwinsville, NY

Michael James DeMotte, M.D., Indianapolis, IN

John Weber Denninger, M.D., Ph.D., Boston, MA

Prabhjot Singh Deol, M.D., Moon Twp, PA

Mahindranauth Deonarine, M.D., Silver Spring, MD

Maria DePena-Nowak, M.D., Rye, NY

Nirmaljit Kaur Dhani, M.D., Mountain View, CA

James Wiley Dickerson III, M.D., Eugene, OR

Chandlee Dickey, M.D., Brookline, MA

Jennifer Bright Dismukes, D.O., Skillman, NJ  
Zvezdana Djuric-Bijedic, M.D., Chicago, IL  
Thang Cao Do, M.D., Bellingham, WA  
Veena Raj Doddakashi, M.D., Bakersfield, CA  
Daniel Hatheway Donovan, M.D., Ph.D, Cookeville, TN  
Humberto Ramon Dorta, M.D., Saegertown, PA  
Trecia Melanie Doyle, M.D., New York, NY  
Roxanne C. Dryden-Edwards, M.D., Germantown, MD  
Wei Du, M.D., Washington Crossing, PA  
Roger Henry Duda, M.D., Alexandria, VA  
James George Dumas, M.D., Kenova, WV  
Nancy Robin Gould Dunbar, M.D., West Chester, PA  
Helen Eve Duncan, M.D., San Marino, CA  
Maria Nina D. Dunn, M.D., Marshall, VA  
Auguste Lytton Duplan, M.D., Ithaca, NY  
Lisa Ann Durette, M.D., Las Vegas, NV  
Vikram Vardhan Duvvi, M.D., Yorktown Heights, NY  
Ramila Duwal, M.D., Redlands, CA  
Willie Roger Earley, M.D., West Chester, PA  
James Henry Edwards, M.D., Fairhope, AL  
Pamela Jean Edwards, M.D., Portland, OR  
Julia Eilenberg, M.D., Rhinebeck, NY  
Ellen Beth Eisenstadt, M.D., New York, NY  
Douglas Ray Eitel, M.D., Alderson, WV  
Chinenye Sylvester Ekoh, M.D., Bowie, MD

Samar Said El-Sayegh, M.D., Ashtabula, OH

Mark Bruckel Elliot, M.D., Lenox, MA

George David Ellis, M.D., Lumberton, NJ

Abdelouahed Elmouchtari, M.D., Hopewell Junction, NY

Todd S. Elwyn, M.D., San Luis Obispo, CA

Jason Luke Engeriser, M.D., Mobile, AL

Paul Alan Erickson, M.D., Saint Paul, MN

Terri Lynn Erwin, M.D., Murray, KY

Patricio Rodrigo Escalona, M.D., Albuquerque, NM

Emad Helmy Eskander, M.D., East Longmeadow, MA

Maged M. Estafan, M.D., Temecula, CA

Yuval Estrov, M.D., La Jolla, CA

Anita Smith Everett, M.D., Glenwood, MD

Michael Joseph Everson, M.D., Lees Summit, MO

Toral Madanmohan Fadia, M.D., Atlanta, GA

Abdul Ahad Faisal, M.D., ALDIE, VA

Olufunke Omobola Fajobi, M.D., Strongsville, OH

Hanaa Wadie Fam, M.D., Irvine, CA

Margaret Fang, M.D., Marlboro, NJ

Jesse Ruey Fann, M.D., Seattle, WA

Brian Andrew Farah, M.D., High Point, NC

Nuri Bradford Farber, M.D., Saint Louis, MO

Rachel Epstein Fargason, M.D., Mountain Brk, AL

Peter Anthony Farol, M.D., MPH, New York, NY

Douglas James Feeley, M.D., Lakeville, MN

Elisa Sharona Feingold, D.O., San Luis Obispo, CA  
Jessica Ariel Feinman, M.D., Portland, OR  
Christopher Francis Fennell, D.O., Jeffersonville, KY  
Melissa Renee Ferguson, M.D., Kerrville, TX  
Rena Kuntavanish Ferguson, M.D., M.P.H., Setauket, NY  
Jamie Donald Feusner, M.D., Los Angeles, CA  
Joseph Frederick Fickes, M.D., Fairfield, CT  
Robia Ann Fields, M.D., Ashburn, VA  
Suk B. Fields, M.D., Madison, AL  
Anna Filova, M.D., Ardsley, NY  
Jeffrey Fishberger, M.D., New York, NY  
Joseph Donovan Fishel, M.D., Ocala, FL  
William Harris Fisher, M.D., Walnut Creek, CA  
Brian Paul Fitch, M.D., Sacramento, CA  
Jeri Eileen Fitzpatrick, M.D., Nashville, TN  
Charles Lee Flake, M.D., Columbia, SC  
Samuel Alan Fleishman, M.D., Fayetteville, NC  
William Robert Flynn, M.D., El Dorado Hills, CA  
Mark Charles Foote, M.D., Salt Lake City, UT  
Elizabeth Boughton Ford, M.D., Hastings on Hudson, NY  
Kara Michelle Forest, M.D., Potomac, MD  
Robyn Ann Foy, M.D., Monclova, OH  
Lauralyn Gates Fredrickson, M.D., New York, NY  
David Harold Friar, M.D., Kaneohe, HI  
Stephen Larry Friedes, M.D., East Hampton, NY

Miriam Mindi Friedlander, M.D., Avon, CT  
Gillian Stephany Friedman, M.D., Irvine, CA  
Jeffrey M. Friend, M.D., Davis, CA  
Elzbieta Fulinska, M.D., Bethlehem, PA  
Irene Gamal Gabrial, M.D., Dayton, NJ  
Antoine Makram Gabriel, M.D., Ogdensburg, NY  
William Francis Gabrielli Jr., M.D., Ph.D, Shawnee, KS  
Sheri Cording Gaines, M.D., Huntsville, TX  
Nader A. Galal, M.D., Astoria, NY  
Christine Woldin Galardy, M.D., Ph.D., Rochester, MN  
Shailesh Gandhi, M.D., Duluth, GA  
Timothy Leo Gannon, M.D., Dublin, CA  
Ellen Nicole Garbo, M.D., North Oaks, MN  
Daniel Garza, M.D., New York, NY  
Micky Gautam, D.O., Plano, TX  
Michael Ethan Gelb, M.D., Portland, OR  
David Mark Gellerman, M.D., Ph.D., El Dorado Hills, CA  
Rita Maria Gelsomini-Gruber, M.D., Lee, NH  
Terri Theis Gerdes, M.D., Saint Cloud, MN  
Twila Bauer Germanson, M.D., Minnetonka, MN  
Carri-Ann Megargel Gibson, M.D., Tampa, FL  
David Kurt Gibson, M.D., Las Vegas, NV  
Robert Gerhard Giebisch, M.D., Woodbridge, CT  
Paul Thomas Giger, M.D., Portland, OR  
Aline Marie Gilbert-Johnson, M.D., Makanda, IL

Sohail Abbas Gillani, M.D., Morrisonville, NY

David Lloyd Ginsberg, M.D., New York, NY

Aitala Giron, M.D., Miami, FL

Nancy Ellen Motzkin Glaser, M.D., Los Angeles, CA

Laurence A. Glasser, M.D., Santa Monica, CA

Mark Richard Gloss, M.D., Brookline, MA

Vinayak S. Gokhale, M.D., Williamsville, NY

Corey N. Goldstein, M.D., Chicago, IL

Rachel Alisa Goldstein, M.D., White Plains, NY

Adam Jacob Goldyne, M.D., San Francisco, CA

Lorri Carmel Golin, M.D., Rutland, VT

Rosa Cristina Gonzalez, M.D., Beaumont, TX

Marianne Seligson Goodman, M.D., Wyckoff, NJ

Kamalinder Kaur Goraya, M.D., Rockville, MD

Rebecca Grace Gordon, M.D., Eugene, OR

Ruth Lauren Graver, M.D., New York, NY

Jeffrey Scott Green, M.D., Bozeman, MT

Joan Marie Green, M.D., Bozeman, MT

Ronald Terry Greene, D.O., Paxton, MA

Shepard Jay Greene, M.D., Redding, CA

William Scott Griffies, M.D., Raleigh, NC

Linda Jean Griffith, M.D., Yellow Springs, OH

Shannon Geroso Gritzenbach, M.D., Downers Grove, IL

Melissa Faith Gross, M.D., Suffolk, VA

Sarah Jane Grossbard, M.D., New York, NY



Thomas Albert Grugle, M.D., DPO, AE  
Cornelius Jason Gucfa, M.D., Urbandale, IA  
Charlotte Joann Guest, M.D., Woodbury, MN  
Peter Scott Guido, M.D., Albuquerque, NM  
Nabil Yacoub Guirguis, M.D., Spring, TX  
Joseph Benjamin Guise, M.D., Little Rock, AR  
Tracy Dianne Gunter, M.D., Zionsville, IN  
Babu Venkatesh Gupta, M.D., Montgomery, OH  
Ramia Gupta, M.D., Alexandria, VA  
Rosben Legaspi Gutierrez, M.D., Poway, CA  
Kim Renee Guy, M.D., Los Angeles, CA  
David Christopher Hager, M.D., Kerrville, TX  
Naveed Haider, M.D., Fargo, ND  
Austin Barrett Hall, M.D., Chapel Hill, NC  
Heather Morse Hall, M.D., Newport, RI  
Derrick Akira Hamaoka, M.D., San Antonio, TX  
Charin Lee Hanlon, M.D., Wilmington, NC  
Huiwen Hao, M.D., Clovis, CA  
A F M Z. Haque, M.D., Plainsboro, NJ  
Asim Haracic, M.D., Washington, DC  
John David Harbison, M.D., Truckee, CA  
Lydia Ward Haren, M.D., Ooltewah, TN  
W. Blake Haren, M.D., Ooltewah, TN  
Jonathan Clark Harland, M.D., Burlington, MA  
Angela Dauby Harper, M.D., Columbia, SC

Roger Martin Harris, M.D., Scarsdale, NY

Thelissa Annette Harris, M.D., Hartford, CT

Myla Ellen Harrison, M.D., Upper Montclair, NJ

William Paul Hartmann, M.D., Mason, OH

Mario Jorge Hasaj, M.D., Jersey City, NJ

Syed Mahmood Hasan, M.D., Carmel, IN

Jaffrey Hashimie, M.D., Tampa, FL

Angel Daniel Hatchett, M.D., Hudson, OH

Dimitrios Hatzivlassiou, M.D., Ph.D., Montverde, FL

Catherine D'Aprix Heffner, D.O., Florham Park, NJ

Jamal S. Hejazi, M.D., Salt Lake City, UT

Jean Monica Hemingway, M.D., Geneva, FL

James Heneghan, M.D., Santa Fe, NM

Mark Hamilton Henigan, D.O., Sacramento, CA

Karen Jeanne Henningson, D.O., Middletown, NJ

David Andrew Hensley, M.D., Morgan Hill, CA

Greta Marie Herbes, M.D., Lake Arrowhead, CA

Jose Onesimo Hernandez, M.D., Tampa, FL

Yadira Hernandez Romon, M.D., San Antonio, TX

Jenna Alane Hiestand, M.D., Juneau, AK

Erica Henderson Hiett, M.D., Little Rock, AR

Karen Fay Higgins, M.D., Grass Valley, CA

Todd P. Hill, D.O., Kansas City, MO

Laura Davidow Hirshbein, M.D., Ph.D., Ann Arbor, MI

Margarita Holsten, M.D., Boulder, CO

Paul Edgar Holtzheimer, M.D., Lebanon, NH

David Eugene Hon, M.D., Wichita, KS

Eden Hope Honig, D.O., Sea Cliff, NY

Elizabeth Brinton Hoover, M.D., Nashville, TN

Noah Seth Horowitz, M.D., Scottsdale, AZ

Tammy Gotlieb Horowitz, M.D., New York, NY

Gregg Anthony Horras, M.D., Saint Paul, MN

Karen L. Horst, M.D., Arvada, CO

Ryan Horst, M.D., Santa Monica, CA

Stacey Elaine Horstman, M.D., Springfield, IL

David Hu, M.D., Wellington, FL

Bei Barbara Huang, M.D., Edison, NJ

Giampaolo Huober, M.D., La Fayette, NY

Robin Annette Hurley, M.D., Salisbury, NC

Ahmed Mohammed Hussain, M.D., Oak Brook, IL

Mazher Hussain, M.D., Troy, MI

Burton Roy Hutto, M.D., Chapel Hill, NC

Todd Mitchell Hutton, M.D., Pasadena, CA

Stephen Crawford Ikeda, M.D., Duxbury, MA

Mohammad Ikram, M.D., Mechanicsburg, PA

Howard Jay Ilivicky, M.D., O Fallon, MO

Shashita Ramsinh Inamdar, M.D., Ph.D., La Jolla, CA

Daria Inbar, M.D., Ashland, OR

Ofelia Ionescu, M.D., Chicago, IL

Alla Iospa, M.D., Brooklyn, NY

Javed Iqbal, M.D., American Canyon, CA  
M. Anjum Irfan, M.D., Exton, PA  
Fructuoso Irigoyen-Rascon, M.D., McAllen, TX  
Faye Fatina Istanbooly, M.D., Larue, TX  
Todd Michael Ivan, M.D., Twinsburg, OH  
Hema Iyer, M.D., Sinking Spring, PA  
Rawah Adnan Jabi, M.D., Indianapolis, IN  
Leticia Gangan Jacinto, M.D., Scottsdale, AZ  
Brian David Andrew Jackson, M.D., Highland, CA  
Edwin Williamson Jackson, M.D., Tampa, FL  
George Frazier Jackson, M.D., Tacoma, WA  
Grace Elizabeth Jackson, M.D., Sedona, AZ  
Katherine Ann Jacoby, M.D., Clarkson, KY  
Gauri Jain, M.D., Huntsville, AL  
Shailesh Jain, M.D., Midland, TX  
Shah Arshaduddin Jalees, M.D., Copley, OH  
Delia Micaela Jano, M.D., Flushing, NY  
Alexander Janums, M.D., Hurley, NY  
Lara Falah Jaradat, M.D., West Chester, PA  
Margaret A. Enochs Jarvis, M.D., Waverly, PA  
Robert Meacham Jarvis, M.D., Little Rock, AR  
Daniel Salvosa Javier, M.D., Nashville, TN  
Alex K. Jenkins, M.D., Portland, OR  
Minna Jinn O'Leary, M.D., Peoria, IL  
Barbara Ann Johnson, M.D., Eden Prairie, MN

David Eddis Johnson, M.D., Kensington, MD  
Eric Austin Johnson, M.D., Milaca, MN  
Rhea Michelle Johnson, M.D., Katonah, NY  
Robin Michele Johnson, M.D., Decatur, GA  
Shannon Andrea Johnson, M.D., Bedford, TX  
Edith May Jolin, M.D., Duxbury, MA  
Thomas McIntosh Jones, M.D., Ph.D., F.A.A.P., Durango, CO  
Jeffrey Douglas Jordan, M.D., Rochester, NY  
Scott Alan Joseph, M.D., Bayview, TX  
Kaustubh Girish Joshi, M.D., Fort Worth, TX  
Jacques Jospitre Jr., M.D., New York, NY  
William Julio, M.D., Bayamon, PR  
Kara Liebling Kahan, M.D., Houston, TX  
Neeraja Kakade, M.D., Clive, IA  
Rakeshkumar Mansukhlal Kaneria, M.D., Mason, OH  
Murray Lee Kapell, M.D., Madison, WI  
Alicia Joy Kaplan, M.D., Pittsburgh, PA  
Michael Kaplowitz, M.D., Bronx, NY  
Varsha Sadhu Karamchandani, M.D., Troy, MI  
Anoop Karippot, M.D., San Diego, CA  
Igor M. Kashtan, M.D., Rochester, NY  
Balbinder Kaur, M.D., Potomac, MD  
Matthew Scott Keene, M.D., Litchfield Pk, AZ  
Julie Renee Kelso Heggem, M.D., Billings, MT  
Karen Dee Kennedy, M.D., York, PA

Shalene Ann Kennedy, M.D., Woodbury, MN

William Michael Kenny, M.D., Peoria, IL

William Charles Keppler III, M.D., Gig Harbor, WA

Keith Bradford Kessel, M.D., Fort Worth, TX

Steven Adam Keys, M.D., Laguna Hills, CA

Ahmad Zia Khan, M.D., Racine, WI

Farah Naeem Khan, M.D., Birmingham, AL

Mubbashir M. Khan, M.D., Douglas, GA

Naureen Khan, M.D., Union City, CA

Neelofar Khan, M.D., Overland Park, KS

Sadaqat Nawaz Khan, M.D., Watertown, NY

Saeed-Uz Zafar Khan, M.D., Waverly, NY

Sumaira Fayyaz Khan, M.D., tampa, FL

Tufal M. Khan, M.D., Rossford, OH

Zia Ahmed Khan, M.D., North Muskegon, MI

Rahul Khurana, M.D., Seattle, WA

Michael Wai Jong Kiang, M.D., Toronto, ON

Mark Duane Kilgus, M.D., Columbia, SC

Doonam Kim, M.D., New York, NY

Jean Kim, M.D., Fulton, MD

Kye Y. Kim, M.D., Roanoke, VA

John Mark Kinzie, M.D., Ph.D., Portland, OR

Paula Claire Kirby-Long, M.D., Lewiston, ME

Kamran Kizilbash, M.D., London, ON

Daniel Robert Klages, M.D., Patchogue, NY

Hilary Kravinsky Klein, M.D., Clayton, MO  
Mark A Koenen, M.D., Seattle, WA  
Harold George Koenig, M.D., Durham, NC  
Thomas Wayne Koenig, M.D., Baltimore, MD  
Renee Scharfman Kohanski, M.D., Norwich, CT  
Andrew Jay Kolodny, M.D., New York, NY  
Victoria Frances Korth, M.D., Rochester, NY  
Tina Lynn Kosnar, M.D., Madison, WI  
Elaine Tina Koukoulas, M.D., Baldwin, MD  
Sander Koyfman, M.D., Brooklyn, NY  
Dennis Dean Kozel, M.D., Milwaukee, WI  
Vincent Edward Krasevic, M.D., Scottsdale, AZ  
David Jacob Kraus, M.D., New York, NY  
Kasturi Kripakaran, M.D., Springfield, IL  
Martin Aaron Kron, M.D., Denver, CO  
Nadia Krupnikova, M.D., Kensington, MD  
Oladipo Ayodeji Kukoyi, M.D., M.S, Lexington, SC  
Simon Kung, M.D., Rochester, MN  
Anlee D. Kuo, M.D., San Francisco, CA  
Tracy Kuranaka, M.D., San Diego, CA  
Eugene Kwon, M.D., M.B.A., Hawthorn Woods, IL  
Maritza Elizabeth Lagos Saez, M.D., Kalamazoo, MI  
Karen Friedman Lang, M.D., Ocean, NJ  
Leonard Kendall Lantz, M.D., Helena, MT  
Kevin Lawrence Laser, M.D., Severna Park, MD

Jawaid Latif, M.D., Proctorville, OH

Mohammad Jawed Latif-Jangda, M.D., Cooper City, FL

Amy Jean Laurent, M.D., Greenville, MI

Michael Ray Lavin, M.D., Owego, NY

Arthur Louis Lazarus, M.D., Palm Coast, FL

Kathleen Marie Lazzarini, M.D., Branford, CT

Frank Myung Lee, M.D., Palo Alto, CA

Li-Wen Grace Lee, M.D., New York, NY

Paula Xiaoping Lee, M.D., Fremont, CA

Tih-Shih Warren Lee, M.D., Singapore, n/a

Tina Ting-Joan Lee, M.D., Palo Alto, CA

Charles Alan Lester, M.D., Muskogee, OK

Hope Wendy Levin, M.D., Pacific Palisades, CA

Laura Beth Levine, M.D., Providence, RI

Feliciano Borbon Leviste, M.D., Middletown, CT

David Robert Levy, M.D., Spring Valley, NY

Donald Thomas Lewis, D.O., Minneapolis, MN

Sonya Alene Lewis, M.D., Ann Arbor, MI

Thomas Barnett Lewis, M.D., San Francisco, CA

Fiona YanHua Li, M.D., Edmond, OK

Julia Yu Li, M.D., Vacaville, CA

Siqing Li, M.D., Arcadia, CA

Lawrence Yibin Liang, M.D., New York, NY

Robert Thomas Light, M.D., Virginia Beach, VA

Sonja Margareta Lillrank, M.D., Falls Church, VA



Charles John Lilly III, M.D., Dulles, VA

Timothy Wyatt Lineberry, M.D., Green Bay, WI

Thomas Larry Lissman, M.D., Portland, OR

Fong Liu, M.D., New Rochelle, NY

Todd Patrick Loftus, M.D., Jackson Heights, NY

John Lohrasbi, M.D., bronx, NY

Robert Louis Loiben, M.D., Mequon, WI

Pamela Audrey London-Barrett, D.O., Fort Washington, PA

Elda Magaly Lopez, M.D., Miami, FL

David Charles Lott, M.D., Naperville, IL

Monica Michelle Lovasz, M.D., San Antonio, TX

Lauri G. Lowenbraun, D.O., Elm Grove, WI

Barbara Bianca Lubrano Di Ciccone, M.D., Wesley Chapel, FL

Joseph Patrick Lucas, M.D., Mountain Brk, AL

Marshall Brent Lucas, M.D., The Woodlands, TX

Susana Castillo Lugo, M.D., Andover, MA

Walker Lyerly IV, M.D., Arlington, VA

Yuhua Ma, M.D., Moorestown, NJ

Amy MacIntyre, M.D., Bala Cynwyd, PA

Linda Kay Madson, M.D., Iowa City, IA

Ronald Magat, M.D., Cumming, GA

Gretchen Elizabeth Magnani, M.D., Havertown, PA

Susan Toba Mahler, M.D., Williamstown, MA

Harry Wallace Mahood, M.D., Schuylerville, NY

William Roy Mains, M.D., San Francisco, CA

Rupa Maitra, M.D., Chesterfield, MO

Vinoda Makam, M.D., Mableton, GA

Lynn Marie Malenfant, M.D., Bull Valley, IL

Kamna Malhotra, M.D., Allentown, PA

Harminder Singh Mallik, M.D., Metairie, LA

Michael John Mancino, M.D., Little Rock, AR

Christopher Mark Marano, M.D., Phoenix, MD

Carl David Marci, M.D., Boston, MA

Robert Grey Marietta, M.D., MPH, Chesapeake, VA

Louis John Marino Jr., M.D., Bristol, RI

Jaco Maritz, M.D., Gander, NL

Ljiljana Markovic, M.D., Pittsfield, MA

Christopher Marra, D.O., San Luis Obispo, CA

Rory Lavell Marraccini, M.D., Breinigsville, PA

Mariana Martinasevic, M.D., Fort Lauderdale, FL

Kenneth Victor Master, M.D., Haddonfield, NJ

Gayle P. Masterson, M.D., Tucson, AZ

Daniel Henry Mathalon, M.D., Ph.D., San Francisco, CA

Rano Thomas Mathew, M.D., Wilmington, NC

Tamar Beth Mathias, M.D., Ridgefield, CT

Jyothi N. Mattam, M.D., Johns Creek, GA

Nathalie Mathilde Maullin, M.D., Santa Monica, CA

Annell Mavrantonis, M.D., Sacramento, CA

Kimberly Carr Mayrose, M.D., Zionsville, IN

Sarah Aderholt McAllister, M.D., Fairfield, CT

Robert Vinton McCarley, M.D., Cape Elizabeth, ME

Alicia Dawn McGill, M.D., New York, NY

Lawrence Michael McGlynn, M.D., Atherton, CA

Maureen Ann McGovern, M.D., Lynn, MA

Kevin Michael McIntyre, M.D., Rochester, NY

Kimberly Daun McLaren, M.D., Austin, TX

Oliver Lamont McPherson, M.D., Ogden, UT

Roger Lowell McRoberts III, M.D., Austin, TX

Martha Alicia Medrano, M.D., San Antonio, TX

Jody Keith Meek, M.D., Grand Cane, LA

Sadoutounnissa Meer, M.D., Fair Oaks, CA

Mehmood Mehdi, M.D., Snellville, GA

Boris Mekinulov, M.D., Brooklyn, NY

Robert James Mendola, M.D., Ithaca, NY

Lisa Mensch, M.D., Williamsburg, VA

Gia Merlo, M.D., M.B.A., Houston, TX

Oren Messeri, M.D., New York, NY

David Walter Metzler, M.D., Onalaska, WI

Eduardo Enrique Meza, M.D., Eden Prairie, MN

Lillian Mezey, M.D., Crozet, VA

Khorshed Alam Miah, M.D., Ph.D., Hackensack, NJ

Amani Boulos Michael, M.D., Canton, MA

James Patrick Michalets, M.D., Asheville, NC

Daniel Constant Mierlak, M.D., Ph.D., Montclair, NJ

Jane Jasna Miles, M.D., Plano, TX

David Ethan Miller, M.D., Louisville, CO

Robyn Renee Miller, M.D., Asheville, NC

Michaela Kathleen Millott, M.D., Newton, MA

Nighat Mirza, M.D., Monroe TWP, NJ

Wajahat Ali Mirza, M.D., mt pleasant, SC

Michael Stanley Mitchell, M.D., Tallahassee, FL

Mahmoud Abdelmonem Mohamed, M.D., Terrell, TX

Meredith Lauretta Mona, M.D., Columbia, SC

Kristina Difrancesco Money, M.D., Crownsville, MD

Jagadeesh Kullai Moola, M.D., Camp Hill, PA

David Richard Mooney, M.D., Colchester, VT

Scott Campbell Moran, M.D., Silver Spring, MD

Maria Angeles Morcuende, M.D., Iowa City, IA

Helena Grace Muirragui, M.D., Lombard, IL

Satyajit Mukherjee, M.D., Mechanicsburg, PA

Swati Shirish Mulay, M.D., Roseville, CA

Sue-Ann Fenton Mulvihill, M.D., Post Falls, ID

Javier Alberto Muniz, M.D., Clarksville, MD

Christopher John Murphy, M.D., Westminster, MD

Dominique Lily Musselman, M.D., MSCR, Miami, FL

Jennifer Emily Myer, M.D., New Haven, CT

Chandrika Nadipuram, M.D., Freehold, NJ

Jon Wendell Nakamura, M.D., Lihue, HI

Cheta Nand, M.D., Richland, WA

Maureen Cecilia Nash, M.D., Portland, OR

Kalpana Isabel Nathan, M.D., Mountain View, CA  
Shajitha Nawaz, M.D., San Marcos, CA  
Nan Elaine Nelson, M.D., Solon, OH  
Aurelian Nicolae Niculescu, M.D., Pittsford, NY  
Konstantin Nikiforov, M.D., Brooklyn, NY  
Rodney Lee Nitcher, D.O., Papillion, NE  
Saifullah Nizamani, M.D., San Diego, CA  
Jeanne Nizigiye, M.D., Brandon, MS  
Ikemefuna Nkanginieme, M.D., NW Canton, OH  
Deanna Jean Dar Juan Nobleza, M.D., Haddonfield, NJ  
Linda Lee Northam, M.D., Morganton, NC  
Jessica Rose Norton, M.D., Rochester, NY  
Douglas Keith Novins, M.D., Denver, CO  
Rosario Nunez-Brito, M.D., Washington DC, DC  
Evaristus Awele Nwulia, M.D., Ellicott City, MD  
Audra Louise Ochsner, M.D., San Antonio, TX  
Joan Marie Odom, M.D., Newport Coast, CA  
Godehard Oepen, M.D. Ph.D., Hoover, AL  
Ikechukwu Robert Ofomata, M.D., Richardson, TX  
Ann Olincy, M.D., Morrison, CO  
Gina Marie Oliveto, M.D., Omaha, NE  
Robert John Olson, M.D., Mankato, MN  
Dost Ongur, M.D., Ph.D., Belmont, MA  
Asli Suzan Orhon, M.D., Richmond, VA  
Nader Oskooilar, M.D., Ph.D., Newport Beach, CA

Robyn Leigh Ostrander, M.D., Westmoreland, NH  
Mary Beth Ostrom, M.D., Idaho Falls, ID  
Henry Biemann Othersen III, M.D., Columbia, SC  
Anitha Raghunath Padmanabhan, M.D., Rochester Hills, MI  
Cheryl Lynn Paizis, D.O., Folsom, CA  
Jae Hong Pak, M.D., Duluth, GA  
Paula Palladino, M.D., Rockville, MD  
Cynthia Lynn Palman, M.D., Eugene, OR  
Hitesh N. Pandya, M.D., Plano, TX  
George I. Papakostas, M.D., Boston, MA  
Michael M. Papin, M.D., Marquette, MI  
George Franklin Parker, M.D., Indianapolis, IN  
Jeffrey David Parks, M.D., Chapel Hill, NC  
Stacey Elean Parks, M.D., dyer, IN  
Leslie Parsons, D.O., Boston, GA  
Ami Nirav Patel, M.D., Fort Mill, SC  
Charu Kaushik Patel, M.D., Taunton, MA  
Neena Mrugesh Patel, M.D., Southlake, TX  
Parimal Babu Patel, M.D., Saint Louis, MO  
Prakashchandra C. Patel, M.D., Hemet, CA  
Rina Ankur Patel, M.D., Mequon, WI  
Sunil Babu Patel, D.O., zionsville, IN  
Janeen Heiman Paul, M.D., Long Grove, IL  
Dovile Paulauskas, M.D., Knoxville, TN  
Charles Jeffery Peck, D.O., Colorado Springs, CO

Roger Peele, M.D., Rockville, MD

Christopher George Pelic, M.D., Mount Pleasant, SC

Christina W. Peragine, M.D., Centennial, CO

Gina Marie Perez, M.D., Kingston, NY

Liliam Perez, M.D., Monterey, CA

Kathleen Susan Perrego, M.D., Scarsdale, NY

Jeffrey Thomas Peterson, M.D., Anaheim, CA

Marija Petrovic, M.D., San Francisco, CA

Bruce Wallace Phariss, M.D., New York, NY

Mara Pheister, M.D., Shorewood, WI

Shelley Diane Piasecki, M.D., Sheboygan, WI

Marta Agnieszka Pieczalska, M.D., Cheyenne, WY

Elizabeth Kingsley Pierson, M.D., Colchester, VT

Brett Charles Plyler, M.D., Chicago, IL

Alan Lee Podawiltz, D.O., Arlington, TX

Anna Alexandrovna Podolskaya, M.D., Crestwood, KY

Henry Lysell Polk, M.D., San Antonio, TX

Marya E. Pollack, M.D., M.P.H., New York, NY

Erika Polyanskaya, M.D., West Hartford, CT

Charita Denyse Pope, M.D., Silver Spring, MD

Anand Parshotam Popli, M.D., Valparaiso, IN

Ernest Benjamin Powell, M.D., Lexington, KY

Megan Shafer Press, M.D., Saint Paul, MN

Eugenia Maclean Priddy, M.D., Arlington, VA

Claudia Lillian Pucci, M.D., Boston, MA

Sreelatha Pulakhandam, M.D., Lake Charles, LA  
Romeo Sison Purugganan, M.D., New York, NY  
Natalie Anne Purvis, M.D., Westminster, MD  
Jared Steven Putnam, M.D., Chevy Chase, MD  
Kip Edward Queenan, M.D., Addison, TX  
Thania Valledor Quesada, M.D., Weston, FL  
Gertie Dizon Quitangon, M.D., New York, NY  
Marina Radisic-Basovic, M.D., South Easton, MA  
Lilia Radulovic, M.D., New York, NY  
Snieguole Radzeviciene, M.D., Muncie, IN  
Zareena Raffi, M.D., Irving, TX  
Anupama Raghavan, M.D., Glen Allen, VA  
Gamal Ahmed Ragheb, M.D., Marblehead, MA  
Anil Kumar Rai, M.D., Lafayette Hill, PA  
Annelies Karin Rainer, M.D., Richmond, CA  
Mohammad H Ramay, M.D., Paramus, NJ  
Altagracia Ramirez, M.D., Lawrence, MA  
Deepak Kalvakota Rao, M.D., Walnut Creek, CA  
Deepti Rao, M.D., Carmel, IN  
Radhika Rao, M.D., St. Louis, MO  
Daniel John Rapport, M.D., Toledo, OH  
Navid Rashid, M.D., Falls Church, VA  
Santhi Sagar Ratakonda, M.D., White Plains, NY  
Muhammad Abdul Rauf, M.D., Fresno, CA  
Chirag Ramesh Raval, M.D., Carol Stream, IL



Himabindu Ravi, M.D., Cary, NC

James Joseph Ray, D.O., Falmouth, ME

Michael Ray, M.D., Solon, OH

Sayed Ahmed Aamir Raza, M.D., Ridgeland, MS

Rama Devi Reddi, M.D., Towson, MD

Muddasani Venkata Reddy, M.D., Saint Louis, MO

Nirmala M. Reddy, M.D., Scarsdale, NY

Veera Nandhikanti Reddy, M.D., Saint Louis, MO

Robert Mark Redondo, M.D., Pittsford, NY

Douglas Richard Reed, M.D., Lewisburg, PA

Michael Mark Reese, M.D., Rochester, MN

Laura Chapman Renbaum, M.D., Clarksville, MD

William John Resch, D.O., Blacklick, OH

Maria L. Reyes-Rabanillo, M.D., Guaynabo, PR

Mark Edward Reynolds, M.D., Dayton, OH

Amanda Elizabeth Rhodes, M.D., Chesapeake, VA

Najeeb Riaz, M.D., Sugar Land, TX

Michael Anthony Rich, M.D., Canton, OH

Joseph R. Richards, M.D., San Antonio, TX

Geri Gesele Richardson, M.D., Duluth, GA

Daniel Mark Richter, M.D., Scarsdale, NY

Beth Anne Ridgway, M.D., Raleigh, NC

Shelly Lynn Riley, M.D., Austin, TX

Joseph Michael Ripperger, M.D., Norman, OK

Piro Rjepaj, M.D., Hershey, PA

Judith Marie Rochon, M.D., Atlanta, GA

Gloria Josefina Rodriguez, M.D., New York, NY

Douglas J. Romero, M.D., San Juan, PR

Noah Lawrence Rosen, M.D., Great Neck, NY

Paul David Rosen, M.D., New York, NY

Valerie Cyrene Rosen, M.D., Austin, TX

Michele Jaime Rosenberg, M.D., New York, NY

David Neil Rosenfeld, M.D., Ridgewood, NJ

Jacob Walton Roth, M.D., Palo Alto, CA

James Patrick Rougle, D.O., Kalispell, MT

Michael S. Roundy, M.D., North Ogden, UT

Sandra Graciela Rubin, M.D., Chevy Chase, MD

Steven Edward Rubin, M.D., Reno, NV

Margaret Ruyle Rukstalis, M.D., Winston Salem, NC

Walter Kenneth Rush IV, M.D., Minneapolis, MN

Audrey M. Hamilton Rushin, M.D., Ashburn, VA

James P. Rusnak-McGovern, M.D., Corpus Christi, TX

Brett Micheal Ryabik, M.D., Kennesaw, GA

Deborah Sue Ryan, M.D., Winterport, ME

Sean Michael Ryan, M.D., San Diego, CA

Aisha Sabir, M.D., Falls Church, VA

Sarah Benington Sacha, D.O., Fairfield, CA

Neayka Sahay, M.D., Milford, CT

Sabira Saifuddin, M.D., Westlake Village, CA

Alicia Mata Saldana, M.D., Buffalo, NY

Ahmad Farid Samir, M.D., Roseville, CA  
Howard Russell Sampley, M.D., Eugene, OR  
Annette Aquino Sanchez, M.D., Tampa, FL  
Francis Madrinan Sanchez, M.D., Burlington, IA  
Antonio Sanchez-Merced, M.D., Guaynabo, PR  
Alpa A. Sanghvi, M.D., Paradise Valley, AZ  
John Joseph Sanitato, M.D., Avon Lake, OH  
MaryGene M. Santa Teresa, M.D., Warwick, RI  
Manish Sapra, M.D., Pittsburgh, PA  
Nicola Catherine Sater, M.D., Bethesda, MD  
Jennifer Rebecca Scarozza, M.D., Buffalo, NY  
Holly Elizabeth Schaefer, M.D., Madison, WI  
Elizabeth Ann Zirker Schiff, M.D., Kentfield, CA  
Jennifer Meredith Schimmel, M.D., New York, NY  
James Howard Schluger, M.D., New York, NY  
Christopher Douglas Schneck, M.D., Aurora, CO  
Steven Matthew Schneider, M.D., Indianapolis, IN  
Mark Schor, M.D., New York, NY  
Caryn Beth Schorr, M.D., Aventura, FL  
Sonya Bosser Schroeder, M.D., Chanhassen, MN  
Brady Joe Schroer, D.O., Fletcher, NC  
Susan Kay Schultz, M.D., Iowa City, IA  
Robert Scott Schumeister, M.D., Hackensack, NJ  
Ann Catherine Schwartz, M.D., Tucker, GA  
Anna Ruth Schwartz, M.D., New York, NY

Michael David Schwartz, D.O., Corona Del Mar, CA

Wendla Anna Schwartz, M.D., Los Gatos, CA

Andreea L. Seritan, M.D., San Francisco, CA

Elena Shabash, M.D., winnetka, CA

Jagdish Vallabhdas Shah, M.D., Charlotte, NC

Margi Chandrakant Shah, M.D., Ardmore, PA

Nihal Kishor Shah, M.D., Seminole, FL

Parul Samir Shah, M.D., Bridgewater, NJ

Vital Shah, M.D., Louisville, KY

Victoria Clare Shampaine, M.D., Chevy Chase, MD

Frank Shao, M.D., Fort Wayne, IN

Alla Yulie Shapiro, M.D., New York, NY

Aditya Sharma, M.D., Murphy, TX

Lisa Braff Shea, M.D., Barrington, RI

Eva Kathleen Sheahan, M.D., Sacramento, CA

Brian Barry Sheitman, M.D., Cary, NC

Charles Shelton, D.O., Lexington, KY

Nitin Sudhakar Shendarkar, M.D., Augusta, GA

Cindy Lee Sherwood, M.D., Crozet, VA

Manish V. Sheth, M.D., La Jolla, CA

Manohar Shetty, M.D., Glenshaw, PA

Thomas Lowell Shoaf, M.D., Dallas, TX

Carles Wesner Sicard, M.D., Apopka, FL

Asra Siddiqi, M.D., Nesconset, NY

Michael Warren Siegell, M.D., New York, NY

Peter John Siekmeier, M.D., Cambridge, MA

Priscilla Elaine Sierk, D.O., West Lake Hills, TX

Elizabeth Alison Sikes, M.D., Saint Cloud, MN

Ravi-Kumar Reddy Singareddy, M.D., Palm Harbor, FL

Abhay Kumar Singh, M.D., MBBS, Falmouth, ME

Deepika Singh, M.D., Morganville, NJ

Jayati Kalyan Singh, M.D., Lafayette, IN

Tangeneare Ward Singh, M.D., Alexandria, VA

Monika Desai Singhal, M.D., Longview, TX

Ronald Bradley Sites, M.D., Savannah, GA

Tracey Goodman Skale, M.D., Cincinnati, OH

Katherine St. Germain Smith, D.O., Mt. Pleasant, SC

Mark Paul Snyder, M.D., Ed.M, West End, NC

Steven Howard Snyderman, M.D., Great Neck, NY

Hydie Jill Sobel, M.D., Albuquerque, NM

Shala Z Sobhani, M.D., Santa Fe, NM

Mary Stream Soderstrom, M.D., Houston, TX

David Francis Soehner, M.D., Dublin, OH

Christopher Lynn Sola, D.O., Shaker Heights, OH

Sherif Soliman, M.D., Hinckley, OH

Scott Michael Soloway, M.D., Brooklyn, NY

Wendy Irwin Somerset, M.D., Tallahassee, FL

Joanne Sotelo, M.D., georgetown, TX

Jorge Luis Sotelo, M.D., Miami, FL

Jeffrey Lawrence Soulen, M.D., Ellicott City, MD

Lynn Layman Spillar, M.D., Austin, TX

Vicky Elizabeth Spratlin, M.D., Augusta, GA

Walter Lester Standridge, M.D., Wheat Ridge, CO

Alan I. Stearns, M.D., New York, NY

Gregory Stepanets, M.D., Selkirk, NY

Hynam David Stephens, M.D., Hastings on Hudson, NY

Scott Randy Stiefel, M.D., Salt Lake City, UT

Zachary Neil Stowe, M.D., Little Rock, AR

Mark Douglas Stracks, M.D., Roxbury, CT

John Patrick Straetmans, M.D., Alpharetta, GA

William Bronislaw Strek, M.D., Eugene, OR

John Christopher Strunk, M.D., Dothan, AL

Debra Jane Stultz, M.D., Huntington, WV

Geetha Anjali Subramaniam, M.D., Washington, DC

James K. Sullivan, M.D., Providence, RI

Patricia Martin Sullivan, M.D., Olney, MD

Shannon Suo, M.D., El Dorado Hills, CA

Craig Bruce Hackett Surman, M.D., Sherborn, MA

Ghulam Mustafa Surti, M.D., Lincoln, RI

Durga Suryadevara, M.D., San Antonio, TX

Holly A. Swartz, M.D., Pittsburgh, PA

Dolorita Rose Sweeney, D.O., Melville, NY

Samantha Clare Symons, M.D., Austin, TX

Katalin Szanto, M.D., Pittsburgh, PA

Eleonora Szmuk, M.D., Dallas, TX

Maria Malgorzata Szpyt-Domanska, M.D., Fresno, CA

Gayathri Devi Tadepalli, M.D., Elon, NC

Brahmaiah Tandra, M.D., Solon, OH

Ching-Ling Cecilia Tang, M.D., Ellicott City, MD

Derek Mitchell Tate, M.D., Bronxville, NY

Sirpa Annette Tavakoli, M.D., San Diego, CA

Marina Taver, M.D., Brooklyn, NY

David Henry Taylor, M.D., Corte Madera, CA

Gabrielle Marie Taylor, M.D., San Rafael, CA

Oleg V. Tcheremissine, M.D., Charlotte, NC

Eyob Hailu Tessema, M.D., Dothan, AL

Steven Vincent Teynor, M.D., Salt Lake City, UT

Subha Thiagarajan, M.D., Pearland, TX

Jason Scott Thomas, M.D., Rancho Cucamonga, CA

Jeanie Marie Thompson, M.D., Godfrey, IL

Joshua Taylor Thornhill IV, M.D., Columbia, SC

David Harrison Tiller, M.D., Norman, OK

Kellie Morris Tolin, M.D., Raleigh, NC

Leslie Katharine Tomek, M.D., West Fargo, ND

Hendry Ton, M.D., Sacramento, CA

Sam Dean Toney, M.D., Odessa, FL

Patricia A. Toups, M.D., Baton Rouge, LA

Karen Astrid Tourian, M.D., Boulder, CO

Mark Harold Townsend, M.D., New Orleans, LA

Phuoc Quang Tran, M.D., Colton, CA

Louis Alphonse Trevisan, M.D., Milford, CT

Mircea Truta, M.D., HANFORD, CA

Carol I Ping Tsao, M.D., Milwaukee, WI

Daniel Tsao, M.D., Arlington, VA

Bethany Jayne Tucker, M.D., Playa Del Rey, CA

Rajeshree Tulloo, M.D., Salisbury, NC

Rajendra Tummala, M.D., Rockville, MD

Rebecca Miriam Twersky-Kengmana, M.D., Bronx, NY

Holly Tytell, M.D., Providence, RI

Dennis Ifeanyi Ugboma, M.D., Sugar Land, TX

Nick Maron Ungson, M.D., Umatilla, FL

John Andrew Van Slyke, D.O., Virginia Beach, VA

Mihaela Vasiliu, M.D., Ogdensburg, NY

Hari Krishna Vemulapalli, M.D., Wexford, PA

Marilouise Venditti, M.D., Cherry Hill, NJ

Abraham Verjovsky, M.D., Edina, MN

Neelam Verma, M.D., Grosse Pointe Shores, MI

Joseph Daniel Villacis, M.D., Cabot, AR

Laurie Vitagliano, M.D., Flushing, NY

David Leo Vlach, M.D., Hartington, NE

Agnieszka Anna Von Strandtmann, M.D., Prt Jeff Sta, NY

Canh Phuong Vu, M.D., Boston, MA

Shyam Arvind Vyas, M.D., Nacogdoches, TX

John Harvey Wagoner, M.D., Davidsonville, MD

Barry Wayne Wall, M.D., Providence, RI



James John Walsh, M.D., Morganton, NC

Kimberly Anne Warneke, M.D., Pearland, TX

Randy Tyler Warner, M.D., Villa Rica, GA

Charles Steven Wasserman, M.D., Chelmsford, MA

Susan Andrea Waterman, M.D., Dpo, AP

Gary B. Watts, M.D., Denton, TX

Jennifer June Weaver, M.D., Alexandria, VA

Bruce Matthew Weeks, M.D., Juneau, AK

Allison Mary Wehr, M.D., Andover, MA

Elaine Ellen Weiner, M.D., Baltimore, MD

Nicolette Ella Weisensel, M.D., Oconomowoc, WI

Robert Lawrence Weisman, D.O., Pittsford, NY

Tanya Emily Weisman, M.D., New York, NY

Erica L. Weiss, M.D., Hamden, CT

Melissa Kneass Wheelock Welby, M.D., Milford, CT

Jonathan Mark Westfall, M.D., Birmingham, AL

Jacob Woodrow Whitener Jr., M.D., Hickory, NC

James Randall Wickham, M.D., Roanoke, VA

Michelle Martha Wiersgalla, M.D., Minneapolis, MN

John Elgin Wilkaitis, M.D., M.S., Brandon, MS

Frederic Basil Will, M.D., Egg Harbor, WI

Alton Williams, M.D., J.D., Durham, NC

Delwin Williams, M.D., Arlington, TX

Joseph Henry Williams, M.D., Sandy Hook, CT

Lauren Dorothy Williams, M.D., Jacksonville, FL

Martin Keith Williams, M.D., Smithfield, NC  
David Allan Williamson, M.B.Ch.B., Annapolis, MD  
Pe Thet Win, M.D., Leesburg, FL  
Donald Kingsley Winter, M.D., Denver, CO  
Karen Sondra Wiviott, M.D., Chicago, IL  
Mark Timothy Wolf, M.D., Spokane, WA  
Nancy S. Wolf, M.D., Beverly Hills, CA  
David Eric Wolff, M.D., Morganville, NJ  
Susan Ilene Wolk, M.D., New York, NY  
Eileen Jan Wong, M.D., Westwood, MA  
Emily Kyin Wong, M.D., Cupertino, CA  
Kit Yue Wong, M.D., Somerville, MA  
William Curtis Wood, M.D., New York, NY  
Celia Maria Woods, M.D., Thousand Oaks, CA  
Agnes Wrobel, M.D., Troy, MI  
Albert Bing-Ru Wu, M.D., Princeton Junction, NJ  
Nancy Sheng-Shih Wu, M.D., Santa Monica, CA  
Junzhe Xu, M.D., Williamsville, NY  
Adeeb Emil Yacoub, M.D., South Setauket, NY  
Rick Alan Yavruian, D.O., Twin Falls, ID  
Jordan Yee, M.D., Fort Worth, TX  
William Albert Yetter, M.D., Virginia Bch, VA  
Alexander Stehle Young, M.D., Los Angeles, CA  
Karen Marie Young, M.D., Bellingham, WA  
Terica Natasha Young, M.D., Concord, NC

Adam Sean Younoszai, D.O., Bethesda, MD

Shahnaz Younus, M.D., Upper Saint Clair, PA

Richard Jesung Yun, M.D., New Haven, CT

Wasiq Ali Zaidi, M.D., Arlington, TX

Ateka Zaki, M.D., Sugar Land, TX

Cari Ann Zansler, M.D., Slidell, LA

Marina Zatman, M.D., Woodbury, CT

Douglas F. Zatzick, M.D., Seattle, WA

John Michael Zebrun, M.D., Amherst, MA

Hailing Zhang, M.D., Pine Brook, NJ

Guilan Zhou, M.D., Forest Hills, NY

Zoran Zimolo, M.D., Fairfield, CT

Patrick Jean Zirnheld, M.D., Indianapolis, IN

Stelios Zodiatis, M.D., Saint James, NY

Michael Anthony Zoglio, M.D., Sacramento, CA

Tara Jane Zuker, M.D., Studio City, CA

**Psychiatry MOC, July 1, 2015**

Moheb Naguib Beshay, M.D., Yorba Linda, CA

Carolina Efren Diao, M.D., Lawrenceville, NJ

Steven Ray Hendricks, D.O., Beech Creek, PA

Francis Ernest Jones III, M.D., West Burlington, IA

Thomas Victor Martin, M.D., Columbia, SC

Shaheen Rahman, M.D., Roslyn Estates, NY

Teresita Sanjurjo, M.D., Brandon, FL

John F. Tokoli, M.D., Rochester, NY

**Psychiatry MOC, August 10, 2015**

Robert Anthony Alonso, M.D., Arlington, VA

Gregory Richard Alsip, M.D., New York, NY

Carlos Orestes Andarsio Jr., M.D., Atlanta, GA

Stanley Paul Ardoin, M.D., Oklahoma City, OK

Nareshkumar Bhaskaran Arulampalam, M.D., Northridge, CA

Byron Dee Bair, M.D., Centerville, UT

Alp Sinan Baran, M.D., Ann Arbor, MI

Grace Caroline Barron, M.D., Irvington, NY

Sara Lynn Bassler, M.D., Santa Cruz, CA

Kalyana Rao Battu, M.D., Loudonville, NY

Ana Maria Bautista-Gutierrez, M.D., Norman, OK

Robert Moss Berman, M.D., Ph.D., New York, NY

Michele Lynne Boyer, M.D., Boise, ID

Joseph Hugh Boyle, M.D., Whitefish, MT

Suchandra Brahma, M.D., Calcutta, WB

Michael Richard Bronzo, M.D., Corte Madera, CA

Millard Dalton Brown III, M.D., Vienna, VA

Michael Anthony Burke, M.D., Atlanta, GA

Robert John Calcaterra, M.D., Glen Head, NY

E. Cabrina Campbell, M.D., Philadelphia, PA

James W. Cannon, M.D., Worthington, OH

Michele Casoli-Reardon, M.D., North Reading, MA

Darwyn Borja Chern, M.D., Scottsdale, AZ

Tin Sik Chin, M.D., Sparta, NJ

Tawnya L. Christiansen, M.D., Seattle, WA

Jonathan Daniel Colen, D.O., Jacksonville, IL

Kevin Boyd Collen, M.D., Nashville, TN

Anisa Dian Cott, M.D., Fulton, MD

Michele Dang Cutitto, M.D., Seattle, WA

Sue Kim DiGiovanni, M.D., Pittsford, NY

Randolf Dwight Dipp, D.O., San Diego, CA

James Adam Eppley, M.D., Union, KY

Adriana Feder, M.D., New York, NY

Alan David Feldman, M.D., Largo, FL

Melinda Teresa Fudge, M.D., Rydal, PA

Vilma Gabbay, M.D., New York, NY

Awni Asham Gayed, M.D., Overland Park, KS

Marjorie Sumner Gies, M.D., Santa Barbara, CA

Harry Gill, M.D., Leonardtown, MD

Robert Neal Golden, M.D., Madison, WI

Daniel Mark Gordon, M.D., Sacramento, CA

Richard Granese, M.D., Laguna Niguel, CA

Janet Wisniewski Grissom, M.D., Ph.D., Salt Lake City, UT

Nicasio Sanchez Gutierrez Jr., M.D., Norman, OK

Lori Lynn Johnson Hake, D.O., Moore, OK

Jerry Lee Halverson, M.D., Fitchburg, WI

Antonio Youssef Hardan, M.D., Stanford, CA

Angelica L. Harrell, M.D., Spring, TX

Raed Jad Hawa, M.D., Toronto, ON

Robin Falkenstine Hogue, M.D., Shreveport, LA

Stephen Crenshaw Humble, M.D., Nashville, TN

Farah Hussain, M.D., Rochester, NY

Asad Ul Islam, M.D., Flower Mound, TX

Heidi Sue Johnson, M.D., Worthington, OH

James Richard Kates, M.D., North Hampton, NH

Lee Ann Welch Kelley, M.D., Phoenix, AZ

Huma Khalil, M.D., reston, VA

Amir Ali Khan, M.D., Roanoke, VA

Christine Kyonga-A Kim, M.D., APO, AE

Jason R. Kornberg, M.D., San Diego, CA

Soe-Moe Kyaw, M.D., Alhambra, CA

Janet Elizabeth Lainhart, M.D., Madison, WI

David Gregory Leonard, M.D., Cincinnati, OH

Dean Frederick MacKinnon, M.D., Baltimore, MD

Dimitri David Markov, M.D., Philadelphia, PA

Christin Jane McIntyre, M.D., Ph.D., Portland, OR

Amelia Rodd McPeak, D.O., Parkersburg, WV

Lydia Heather Miller-Anderson, M.D., Chapel Hill, NC

Tawfik Mansour Mukhtar-Benghozi, M.D., Alexandria, LA

Mark Howard Nicholson, M.D., Billings, MT

Alina Cordoves Nodal, M.D., Hialeah, FL

Atinuke Abidemi Ogunlade, M.D., Horseheads, NY

Lisa Ann Pan, M.D., Pittsburgh, PA

Maitri Rajnikant Patel, M.D., Wellesley, MA  
Gregory Paul, M.D., Austin, TX  
David Alexander Pepper, M.D., Simsbury, CT  
Vyas Durga Persaud, M.D., Pleasantville, NY  
Cheryl Lynn Person, M.D., Bellaire, TX  
Alexandria G. Polles, M.D., Purvis, MS  
Yann Bruno Poncin, M.D., Cheshire, CT  
Moataz M. Ragheb, M.D., Ph.D., Houston, TX  
Elizabeth Ann Romero, M.D., Albuquerque, NM  
Adam Robert Rosen, M.D., Lenox, MA  
Antonio Alberto Sanchez, M.D., New York, NY  
Neil Brian Sandson, M.D., Timonium, MD  
Roy Walter Schlegel, M.D., Olympia, WA  
John Henry Schneider, M.D., Richfield, WI  
Michael Bret Schneider, M.D., Menlo Park, CA  
Hanish Sethi, M.D., Windermere, FL  
Haroon W. Siddique, M.D., Southlake, TX  
Michelle Renee Simon, M.D., Houma, LA  
Darshan Singh, M.D., Beavercreek, OH  
Eric Graham Smith, M.D., Holden, MA  
David Ian Teitel, M.D., New York, NY  
Michael Matthew Thebert, M.D., Rockford, MI  
Andrea Megan Thomas, M.D., Vestavia, AL  
Patrick Todd Triplett, M.D., Baltimore, MD  
Christine Jane Truman, M.D., Norfolk, VA



Anthony Michael Vaca, M.D., Harrisburg, SD

Brandon Jeremy Vance, M.D., San Francisco, CA

Umamaheswara Rao Vellanki, M.D., Springfield, OH

Jorge Julian Villalba, M.D., Thonotosassa, FL

Mark William Wagner, M.D., Gilford, NH

Meredith Clark Walgren, M.D., Ph.D., Nashville, TN

Eugene Wang, M.D., Vancouver, BC

Lee Ming-Li Wang, M.D., Ann Arbor, MI

Julie Lara Weinbach, M.D., Pacific Palisades, CA

Leigh Anne White, M.D., Haslett, MI

Catherine Anne Whitehouse, M.D., Black River Falls, WI

Mark Joseph Woyshville, M.D., Middleburg Heights, OH

James Maurice Youakim, M.D., Chester Springs, PA

Ann Zachariah, M.D., SugarLand, TX

Jose Tomas Zaglul, M.D., Tampa, FL

Layla Ziaee, M.D., Saint Louis, MO
